# Supplementary material for: The haplotype-based analysis of Aegilops tauschii introgression into hard red winter wheat and its impact on productivity traits
Source: bioRxiv preprint, doi:10.1101/2021.05.29.446303, version 2 (2021-07-15)
Supplement: Supplemental File 8 [file 446303_file11.xlsx]

## Sheet: Samples_with_extreme_Hdate
File S8. Verification of haplotypes associated with spikelet number and heading date in the Ae. tauschii introgression population based on the allelic effect of the SNPs observed in the introgression lines with extreme phenotype.
Trait: Heading date				Trial: Ashland 2020				Population: Ae. tauschii introgression population
SNP	Chrom	Pos	Allele_Effect	FDR_Pvalue	Alleles	Effect_allele	KanMark	TA2543	112_8	112_12	Larry	TA2521	103_3	103_4
chr2D_16574050	2	16574050	-0.852219	0.0165492	T/C	T	T	C	C	C	T	C	T	T
chr2D_16574159	2	16574159	-0.852219	0.0165492	T/A	T	T	A	A	A	T	A	T	T
chr2D_16574210	2	16574210	0.852219	0.0165492	A/G	G	A	G	G	G	A	G	A	A
chr2D_16574497	2	16574497	-0.852219	0.0165492	G/C	G	G	C	C	C	G	C	G	G
chr2D_16574514	2	16574514	-0.852219	0.0165492	T/C	T	T	C	C	C	T	C	T	T
chr2D_16574517	2	16574517	-0.852219	0.0165492	T/C	T	T	C	C	C	T	C	T	T
chr2D_16574569	2	16574569	0.852219	0.0165492	A/C	C	A	C	C	C	A	C	A	A
chr2D_16574715	2	16574715	0.852219	0.0165492	A/G	G	A	G	G	G	A	G	A	A
chr2D_16575276	2	16575276	-0.865528	0.0165492	A/C	C	C	A	A	A	C	A	C	C
chr2D_16575283	2	16575283	0.852219	0.0165492	A/G	G	A	G	G	G	A	G	A	A
chr2D_16575550	2	16575550	-0.865528	0.0165492	T/A	T	T	A	A	A	T	A	T	T
chr2D_16575596	2	16575596	-0.865528	0.0165492	C/G	G	G	C	C	C	G	C	G	G
chr2D_16575620	2	16575620	0.852219	0.0165492	A/T	T	A	T	T	T	A	T	A	A
chr2D_16575662	2	16575662	0.852219	0.0165492	G/T	T	G	T	T	T	G	T	G	G		Manhattan plot showing the location of loci with SNPs significantly associated with the nimber of days to heading date
chr2D_16575799	2	16575799	0.852219	0.0165492	C/T	T	C	T	T	T	C	T	C	C
chr2D_16576064	2	16576064	0.865528	0.0165492	C/G	G	C	G	G	G	C	G	C	C		Note:
chr2D_16576134	2	16576134	0.852219	0.0165492	A/C	C	A	C	C	C	A	C	A	A		Allele effect in GAPIT, corresponds to the second allele in alphabetical order.
chr2D_16576431	2	16576431	0.852219	0.0165492	A/G	G	A	G	G	G	A	G	A	A		Acessions 112_8 and 112_12 (KanMark x TA2543) had the highest number of days to heading (211 days) while 103_3 and 103_4 (Larry x TA2521) had the lowest number of days to heading (197 days).
chr2D_16576520	2	16576520	-0.852219	0.0165492	G/A	G	G	A	A	A	G	A	G	G		The number of days to heading were calculated as the difference between heading date and planting date.
chr2D_16576687	2	16576687	-0.852219	0.0165492	C/A	C	C	A	A	A	C	A	C	C
chr2D_16576810	2	16576810	0.852219	0.0165492	A/G	G	A	G	G	G	A	G	A	A		Key
chr2D_16577220	2	16577220	-0.852219	0.0165492	G/A	G	G	A	A	A	G	A	G	G			Chr2D alleles with reducing effect on the number of days to heading
chr2D_16577410	2	16577410	0.852219	0.0165492	G/T	T	G	T	T	T	G	T	G	G			Chr4D alleles with reducing effect on the number of days to heading
chr2D_16577558	2	16577558	-0.852219	0.0165492	G/A	G	G	A	A	A	G	A	G	G			Chr2D and chr4D allele with increasing effect on the number of days to heading
chr2D_16577627	2	16577627	0.852219	0.0165492	C/G	G	C	G	G	G	C	G	C	C
chr2D_16577685	2	16577685	0.852219	0.0165492	A/G	G	A	G	G	G	A	G	A	A
chr2D_16577890	2	16577890	0.84993	0.0168852	A/G	G	A	G	G	G	A	G	A	A
chr2D_16578059	2	16578059	0.852219	0.0165492	C/T	T	C	T	T	T	C	T	C	C
chr2D_16578063	2	16578063	-0.84993	0.0168852	G/A	G	G	A	A	A	G	A	G	G
chr2D_16578150	2	16578150	-0.852219	0.0165492	C/A	C	C	A	A	A	C	A	C	C
chr2D_16578397	2	16578397	0.852219	0.0165492	A/T	T	A	T	T	T	A	T	A	A
chr2D_16578670	2	16578670	0.852219	0.0165492	C/G	G	C	G	G	G	C	G	C	C
chr2D_16578720	2	16578720	-0.852219	0.0165492	T/G	T	T	G	G	G	T	G	T	T
chr2D_16578840	2	16578840	-0.852219	0.0165492	T/G	T	T	G	G	G	T	G	T	T
chr2D_16578867	2	16578867	0.852219	0.0165492	C/T	T	C	T	T	T	C	T	C	C
chr2D_16578870	2	16578870	-0.852219	0.0165492	G/A	G	G	A	A	A	G	A	G	G
chr2D_16578903	2	16578903	-0.852219	0.0165492	G/C	G	G	C	C	C	G	C	G	G
chr2D_16578953	2	16578953	-0.852219	0.0165492	T/G	T	T	G	G	G	T	G	T	T
chr2D_16578968	2	16578968	-0.852219	0.0165492	T/G	T	T	G	G	G	T	G	T	T
chr2D_16578982	2	16578982	-0.852219	0.0165492	T/C	T	T	C	C	C	T	C	T	T
chr2D_16579032	2	16579032	0.852219	0.0165492	C/G	G	C	G	G	G	C	G	C	C
chr2D_16579081	2	16579081	0.852219	0.0165492	A/T	T	A	T	T	T	A	T	A	A
chr2D_16579269	2	16579269	-0.852219	0.0165492	G/A	G	G	A	A	A	G	A	G	G
chr2D_16579320	2	16579320	-0.852219	0.0165492	G/A	G	G	A	A	A	G	A	G	G
chr2D_16579366	2	16579366	0.84993	0.0168852	A/G	G	A	G	G	G	A	G	A	A
chr2D_16579417	2	16579417	0.852219	0.0165492	A/G	G	A	G	G	G	A	G	A	A
chr2D_16584892	2	16584892	-0.852219	0.0165492	C/A	C	C	A	A	A	C	A	C	C
chr2D_16585230	2	16585230	-0.852219	0.0165492	T/C	T	T	C	C	C	T	C	T	T
chr2D_16586979	2	16586979	0.852219	0.0165492	A/G	G	A	G	G	G	A	G	A	A
chr2D_16587055	2	16587055	0.852219	0.0165492	A/G	G	A	G	G	G	A	G	A	A
chr2D_16587147	2	16587147	-0.852219	0.0165492	G/A	G	G	A	A	A	G	A	G	G
chr2D_16587279	2	16587279	-0.852219	0.0165492	T/G	T	T	G	G	G	T	G	T	T
chr2D_16587605	2	16587605	-0.84993	0.0168852	T/G	T	T	G	G	G	T	G	T	T
chr2D_16587838	2	16587838	0.84993	0.0168852	A/G	G	A	G	G	G	A	G	A	A
chr2D_16587858	2	16587858	0.852219	0.0165492	A/G	G	A	G	G	G	A	G	A	A
chr2D_16587981	2	16587981	-0.852219	0.0165492	T/C	T	T	C	C	C	T	C	T	T
chr2D_16588059	2	16588059	0.852219	0.0165492	A/G	G	A	G	G	G	A	G	A	A
chr2D_16590530	2	16590530	0.852219	0.0165492	A/C	C	A	C	C	C	A	C	A	A
chr2D_16591796	2	16591796	0.84993	0.0168852	G/T	T	G	T	T	T	G	T	G	G
chr2D_16591803	2	16591803	0.852219	0.0165492	A/G	G	A	G	G	G	A	G	A	A
chr2D_16591807	2	16591807	-0.84993	0.0168852	G/A	G	G	A	A	A	G	A	G	G
chr2D_16592827	2	16592827	0.84993	0.0168852	A/G	G	A	G	G	G	A	G	A	A
chr2D_16592857	2	16592857	0.852219	0.0165492	A/G	G	A	G	G	G	A	G	A	A
chr2D_16594562	2	16594562	-0.852219	0.0165492	T/A	T	T	A	A	A	T	A	T	T
chr2D_16595918	2	16595918	-0.84993	0.0168852	G/A	G	G	A	A	A	G	A	G	G
chr2D_16595966	2	16595966	0.852219	0.0165492	A/G	G	A	G	G	G	A	G	A	A
chr2D_16597314	2	16597314	0.84993	0.0168852	A/G	G	A	G	G	G	A	G	A	A
chr2D_16597427	2	16597427	-0.852219	0.0165492	G/A	G	G	A	A	A	G	A	G	G
chr2D_16597454	2	16597454	-0.852219	0.0165492	T/C	T	T	C	C	C	T	C	T	T
chr2D_16597705	2	16597705	0.852219	0.0165492	A/G	G	A	G	G	G	A	G	A	A
chr2D_16597906	2	16597906	-0.852219	0.0165492	C/A	C	C	A	A	A	C	A	C	C
chr2D_16598648	2	16598648	-0.852219	0.0165492	T/C	T	T	C	C	C	T	C	T	T
chr2D_16599520	2	16599520	-0.84993	0.0168852	G/C	G	G	C	C	C	G	C	G	G
chr2D_16599728	2	16599728	-0.852219	0.0165492	T/G	T	T	G	G	G	T	G	T	T
chr2D_16600300	2	16600300	0.852219	0.0165492	C/T	T	C	T	T	T	C	T	C	C
chr2D_16600543	2	16600543	-0.852219	0.0165492	T/C	T	T	C	C	C	T	C	T	T
chr2D_16600887	2	16600887	-0.852219	0.0165492	T/C	T	T	C	C	C	T	C	T	T
chr2D_16601052	2	16601052	0.852219	0.0165492	C/G	G	C	G	G	G	C	G	C	C
chr2D_16601206	2	16601206	-0.852219	0.0165492	G/C	G	G	C	C	C	G	C	G	G
chr2D_16601327	2	16601327	-0.852219	0.0165492	G/A	G	G	A	A	A	G	A	G	G
chr2D_16610578	2	16610578	-0.852219	0.0165492	T/C	T	T	C	C	C	T	C	T	T
chr2D_16610607	2	16610607	0.852219	0.0165492	A/G	G	A	G	G	G	A	G	A	A
chr2D_16610634	2	16610634	-0.852219	0.0165492	T/C	T	T	C	C	C	T	C	T	T
chr2D_16611105	2	16611105	0.852219	0.0165492	A/G	G	A	G	G	G	A	G	A	A
chr2D_16612571	2	16612571	0.852219	0.0165492	A/C	C	A	C	C	C	A	C	A	A
chr2D_16612575	2	16612575	0.852219	0.0165492	A/G	G	A	G	G	G	A	G	A	A
chr2D_16614902	2	16614902	0.852219	0.0165492	A/G	G	A	G	G	G	A	G	A	A
chr2D_16614913	2	16614913	-0.852219	0.0165492	G/C	G	G	C	C	C	G	C	G	G
chr2D_16614958	2	16614958	0.852219	0.0165492	A/G	G	A	G	G	G	A	G	A	A
chr2D_16615661	2	16615661	0.852219	0.0165492	A/G	G	A	G	G	G	A	G	A	A
chr2D_16615706	2	16615706	0.852219	0.0165492	A/C	C	A	C	C	C	A	C	A	A
chr2D_16615740	2	16615740	0.852219	0.0165492	A/G	G	A	G	G	G	A	G	A	A
chr2D_16619216	2	16619216	-0.84993	0.0168852	C/A	C	C	A	A	A	C	A	C	C
chr2D_16619230	2	16619230	0.852219	0.0165492	A/G	G	A	G	G	G	A	G	A	A
chr2D_16620226	2	16620226	0.852219	0.0165492	A/G	G	A	G	G	G	A	G	A	A
chr2D_16620508	2	16620508	0.852219	0.0165492	A/G	G	A	G	G	G	A	G	A	A
chr2D_16620510	2	16620510	-0.852219	0.0165492	T/C	T	T	C	C	C	T	C	T	T
chr2D_16620599	2	16620599	0.852219	0.0165492	A/G	G	A	G	G	G	A	G	A	A
chr2D_16625766	2	16625766	0.852219	0.0165492	A/G	G	A	G	G	G	A	G	A	A
chr2D_16625855	2	16625855	0.84993	0.0168852	C/T	T	C	T	T	T	C	T	C	C
chr2D_16625882	2	16625882	0.84993	0.0168852	C/T	T	C	T	T	T	C	T	C	C
chr2D_16625895	2	16625895	0.852219	0.0165492	A/G	G	A	G	G	G	A	G	A	A
chr2D_16625923	2	16625923	0.852219	0.0165492	A/G	G	A	G	G	G	A	G	A	A
chr2D_16627973	2	16627973	-0.852219	0.0165492	G/A	G	G	A	A	A	G	A	G	G
chr2D_16628366	2	16628366	0.852219	0.0165492	A/G	G	A	G	G	G	A	G	A	A
chr2D_16628428	2	16628428	-0.852219	0.0165492	T/A	T	T	A	A	A	T	A	T	T
chr2D_16633328	2	16633328	0.84993	0.0168852	C/T	T	C	T	T	T	C	T	C	C
chr2D_16635669	2	16635669	0.84993	0.0168852	C/T	T	C	T	T	T	C	T	C	C
chr2D_16639561	2	16639561	-0.84993	0.0168852	G/A	G	G	A	A	A	G	A	G	G
chr4D_442735095	4	442735095	1.17033	0.0165492	T/C	T	T	T	T	T	C	T	T	C
chr4D_442746457	4	442746457	1.09866	0.0165492	G/A	G	A	G	G	G	A	G	G	A
chr4D_442747114	4	442747114	1.09866	0.0165492	T/A	T	A	T	T	T	A	T	T	A
chr4D_442747895	4	442747895	1.09866	0.0165492	G/A	G	A	G	G	G	A	G	G	A
chr4D_442751954	4	442751954	-1.17033	0.0165492	A/G	G	A	A	A	A	G	A	A	G
chr4D_442757767	4	442757767	1.09866	0.0165492	G/A	G	A	G	G	G	A	G	G	A
chr4D_442759775	4	442759775	1.09866	0.0165492	T/C	T	C	T	T	T	C	T	T	C
chr4D_459271685	4	459271685	1.31813	0.0229622	T/A	T	T	T	T	T	W	T	A	W
chr4D_459272042	4	459272042	-1.31813	0.0229622	C/G	G	C	C	C	C	S	C	G	S
chr4D_459272169	4	459272169	-1.31813	0.0229622	A/G	G	A	A	A	A	R	A	G	R
chr4D_459272191	4	459272191	1.31813	0.0229622	C/A	C	C	C	C	C	M	C	A	M
chr4D_459272198	4	459272198	1.31813	0.0229622	T/G	T	T	T	T	T	K	T	G	K
chr4D_459272235	4	459272235	-1.31813	0.0229622	A/G	G	A	A	A	A	R	A	G	R
chr4D_459272250	4	459272250	-1.31813	0.0229622	A/G	G	A	A	A	A	R	A	G	R
chr4D_459272301	4	459272301	-1.31813	0.0229622	A/G	G	A	A	A	A	R	A	G	R
chr4D_459272507	4	459272507	1.31813	0.0229622	G/A	G	G	G	G	G	R	G	A	R

## Sheet: Introgression_population
rs	alleles	chrom	pos	Allele_effect	FDR_Pvalue	Effect_allele	Reducing_Haplotype	Increasing_Haplotype	98_10	97_22	97_21	97_23	98_19	98_17	98_18	108_10	98_15	108_11	98_16	98_13	98_14	98_11	98_12	99_21	99_22	99_20	99_18	99_19	99_16	99_17	99_14	99_15	99_12	99_13	99_10	99_11	109_19	109_18	109_15	109_14	109_17	109_16	109_11	109_10	109_13	109_12	120_1	120_3	120_2
chr2D_16574050	T/C	2	16574050	-0.852219	0.0165492	T	T	C	T	C	C	C	C	C	T	C	T	C	T	T	T	T	T	T	T	T	T	T	T	T	T	T	T	T	T	T	T	T	T	T	T	Y	T	T	T	T	C	C	C
chr2D_16574159	T/A	2	16574159	-0.852219	0.0165492	T	T	A	T	A	A	A	A	A	T	A	T	A	T	T	T	T	T	T	T	T	T	T	T	T	T	T	T	T	T	T	T	T	T	T	T	W	T	T	T	T	A	A	A
chr2D_16574210	A/G	2	16574210	0.852219	0.0165492	G	A	G	A	G	G	G	G	G	A	G	A	G	A	A	A	A	A	A	A	A	A	A	A	A	A	A	A	A	A	A	A	A	A	A	A	R	A	A	A	A	G	G	G
chr2D_16574497	G/C	2	16574497	-0.852219	0.0165492	G	G	C	G	C	C	C	C	C	G	C	G	C	G	G	G	G	G	G	G	G	G	G	G	G	G	G	G	G	G	G	G	G	G	G	G	S	G	G	G	G	C	C	C
chr2D_16574514	T/C	2	16574514	-0.852219	0.0165492	T	T	C	T	C	C	C	C	C	T	C	T	C	T	T	T	T	T	T	T	T	T	T	T	T	T	T	T	T	T	T	T	T	T	T	T	Y	T	T	T	T	C	C	C
chr2D_16574517	T/C	2	16574517	-0.852219	0.0165492	T	T	C	T	C	C	C	C	C	T	C	T	C	T	T	T	T	T	T	T	T	T	T	T	T	T	T	T	T	T	T	T	T	T	T	T	Y	T	T	T	T	C	C	C
chr2D_16574569	A/C	2	16574569	0.852219	0.0165492	C	A	C	A	C	C	C	C	C	A	C	A	C	A	A	A	A	A	A	A	A	A	A	A	A	A	A	A	A	A	A	A	A	A	A	A	M	A	A	A	A	C	C	C
chr2D_16574715	A/G	2	16574715	0.852219	0.0165492	G	A	G	A	G	G	G	G	G	A	G	A	G	A	A	A	A	A	A	A	A	A	A	A	A	A	A	A	A	A	A	A	A	A	A	A	R	A	A	A	A	G	G	G
chr2D_16575276	A/C	2	16575276	-0.865528	0.0165492	C	C	A	C	A	A	A	A	A	C	A	C	A	C	C	C	C	C	C	C	C	C	C	C	C	C	C	C	C	C	C	C	C	C	C	C	M	C	C	C	C	A	A	A
chr2D_16575283	A/G	2	16575283	0.852219	0.0165492	G	A	G	A	G	G	G	G	G	A	G	A	G	A	A	A	A	A	A	A	A	A	A	A	A	A	A	A	A	A	A	A	A	A	A	A	R	A	A	A	A	G	G	G
chr2D_16575550	T/A	2	16575550	-0.865528	0.0165492	T	T	A	T	A	A	A	A	A	T	A	T	A	T	T	T	T	T	T	T	T	T	T	T	T	T	T	T	T	T	T	T	T	T	T	T	W	T	T	T	T	A	A	A
chr2D_16575596	C/G	2	16575596	-0.865528	0.0165492	G	G	C	G	C	C	C	C	C	G	C	G	C	G	G	G	G	G	G	G	G	G	G	G	G	G	G	G	G	G	G	G	G	G	G	G	S	G	G	G	G	C	C	C
chr2D_16575620	A/T	2	16575620	0.852219	0.0165492	T	A	T	A	T	T	T	T	T	A	T	A	T	A	A	A	A	A	A	A	A	A	A	A	A	A	A	A	A	A	A	A	A	A	A	A	W	A	A	A	A	T	T	T
chr2D_16575662	G/T	2	16575662	0.852219	0.0165492	T	G	T	G	T	T	T	T	T	G	T	G	T	G	G	G	G	G	G	G	G	G	G	G	G	G	G	G	G	G	G	G	G	G	G	G	K	G	G	G	G	T	T	T
chr2D_16575799	C/T	2	16575799	0.852219	0.0165492	T	C	T	C	T	T	T	T	T	C	T	C	T	C	C	C	C	C	C	C	C	C	C	C	C	C	C	C	C	C	C	C	C	C	C	C	Y	C	C	C	C	T	T	T
chr2D_16576064	C/G	2	16576064	0.865528	0.0165492	G	C	G	C	G	G	G	G	G	C	G	C	G	C	C	C	C	C	C	C	C	C	C	C	C	C	C	C	C	C	C	C	C	C	C	C	S	C	C	C	C	G	G	G
chr2D_16576134	A/C	2	16576134	0.852219	0.0165492	C	A	C	A	C	C	C	C	C	A	C	A	C	A	A	A	A	A	A	A	A	A	A	A	A	A	A	A	A	A	A	A	A	A	A	A	M	A	A	A	A	C	C	C
chr2D_16576431	A/G	2	16576431	0.852219	0.0165492	G	A	G	A	G	G	G	G	G	A	G	A	G	A	A	A	A	A	A	A	A	A	A	A	A	A	A	A	A	A	A	A	A	A	A	A	R	A	A	A	A	G	G	G
chr2D_16576520	G/A	2	16576520	-0.852219	0.0165492	G	G	A	G	A	A	A	A	A	G	A	G	A	G	G	G	G	G	G	G	G	G	G	G	G	G	G	G	G	G	G	G	G	G	G	G	R	G	G	G	G	A	A	A
chr2D_16576687	C/A	2	16576687	-0.852219	0.0165492	C	C	A	C	A	A	A	A	A	C	A	C	A	C	C	C	C	C	C	C	C	C	C	C	C	C	C	C	C	C	C	C	C	C	C	C	M	C	C	C	C	A	A	A
chr2D_16576810	A/G	2	16576810	0.852219	0.0165492	G	A	G	A	G	G	G	G	G	A	G	A	G	A	A	A	A	A	A	A	A	A	A	A	A	A	A	A	A	A	A	A	A	A	A	A	R	A	A	A	A	G	G	G
chr2D_16577220	G/A	2	16577220	-0.852219	0.0165492	G	G	A	G	A	A	A	A	A	G	A	G	A	G	G	G	G	G	G	G	G	G	G	G	G	G	G	G	G	G	G	G	G	G	G	G	R	G	G	G	G	A	A	A
chr2D_16577410	G/T	2	16577410	0.852219	0.0165492	T	G	T	G	T	T	T	T	T	G	T	G	T	G	G	G	G	G	G	G	G	G	G	G	G	G	G	G	G	G	G	G	G	G	G	G	K	G	G	G	G	T	T	T
chr2D_16577558	G/A	2	16577558	-0.852219	0.0165492	G	G	A	G	A	A	A	A	A	G	A	G	A	G	G	G	G	G	G	G	G	G	G	G	G	G	G	G	G	G	G	G	G	G	G	G	R	G	G	G	G	A	A	A
chr2D_16577627	C/G	2	16577627	0.852219	0.0165492	G	C	G	C	G	G	G	G	G	C	G	C	G	C	C	C	C	C	C	C	C	C	C	C	C	C	C	C	C	C	C	C	C	C	C	C	S	C	C	C	C	G	G	G
chr2D_16577685	A/G	2	16577685	0.852219	0.0165492	G	A	G	A	G	G	G	G	G	A	G	A	G	A	A	A	A	A	A	A	A	A	A	A	A	A	A	A	A	A	A	A	A	A	A	A	R	A	A	A	A	G	G	G
chr2D_16577890	A/G	2	16577890	0.84993	0.0168852	G	A	G	A	G	G	G	G	G	A	G	A	G	A	A	A	A	A	A	A	A	A	A	A	A	A	A	A	A	A	A	A	A	A	A	A	R	A	A	A	A	G	G	G
chr2D_16578059	C/T	2	16578059	0.852219	0.0165492	T	C	T	C	T	T	T	T	T	C	T	C	T	C	C	C	C	C	C	C	C	C	C	C	C	C	C	C	C	C	C	C	C	C	C	C	Y	C	C	C	C	T	T	T
chr2D_16578063	G/A	2	16578063	-0.84993	0.0168852	G	G	A	G	A	A	A	A	A	G	A	G	A	G	G	G	G	G	G	G	G	G	G	G	G	G	G	G	G	G	G	G	G	G	G	G	R	G	G	G	G	A	A	A
chr2D_16578150	C/A	2	16578150	-0.852219	0.0165492	C	C	A	C	A	A	A	A	A	C	A	C	A	C	C	C	C	C	C	C	C	C	C	C	C	C	C	C	C	C	C	C	C	C	C	C	M	C	C	C	C	A	A	A
chr2D_16578397	A/T	2	16578397	0.852219	0.0165492	T	A	T	A	T	T	T	T	T	A	T	A	T	A	A	A	A	A	A	A	A	A	A	A	A	A	A	A	A	A	A	A	A	A	A	A	W	A	A	A	A	T	T	T
chr2D_16578670	C/G	2	16578670	0.852219	0.0165492	G	C	G	C	G	G	G	G	G	C	G	C	G	C	C	C	C	C	C	C	C	C	C	C	C	C	C	C	C	C	C	C	C	C	C	C	S	C	C	C	C	G	G	G
chr2D_16578720	T/G	2	16578720	-0.852219	0.0165492	T	T	G	T	G	G	G	G	G	T	G	T	G	T	T	T	T	T	T	T	T	T	T	T	T	T	T	T	T	T	T	T	T	T	T	T	K	T	T	T	T	G	G	G
chr2D_16578840	T/G	2	16578840	-0.852219	0.0165492	T	T	G	T	G	G	G	G	G	T	G	T	G	T	T	T	T	T	T	T	T	T	T	T	T	T	T	T	T	T	T	T	T	T	T	T	K	T	T	T	T	G	G	G
chr2D_16578867	C/T	2	16578867	0.852219	0.0165492	T	C	T	C	T	T	T	T	T	C	T	C	T	C	C	C	C	C	C	C	C	C	C	C	C	C	C	C	C	C	C	C	C	C	C	C	Y	C	C	C	C	T	T	T
chr2D_16578870	G/A	2	16578870	-0.852219	0.0165492	G	G	A	G	A	A	A	A	A	G	A	G	A	G	G	G	G	G	G	G	G	G	G	G	G	G	G	G	G	G	G	G	G	G	G	G	R	G	G	G	G	A	A	A
chr2D_16578903	G/C	2	16578903	-0.852219	0.0165492	G	G	C	G	C	C	C	C	C	G	C	G	C	G	G	G	G	G	G	G	G	G	G	G	G	G	G	G	G	G	G	G	G	G	G	G	S	G	G	G	G	C	C	C
chr2D_16578953	T/G	2	16578953	-0.852219	0.0165492	T	T	G	T	G	G	G	G	G	T	G	T	G	T	T	T	T	T	T	T	T	T	T	T	T	T	T	T	T	T	T	T	T	T	T	T	K	T	T	T	T	G	G	G
chr2D_16578968	T/G	2	16578968	-0.852219	0.0165492	T	T	G	T	G	G	G	G	G	T	G	T	G	T	T	T	T	T	T	T	T	T	T	T	T	T	T	T	T	T	T	T	T	T	T	T	K	T	T	T	T	G	G	G
chr2D_16578982	T/C	2	16578982	-0.852219	0.0165492	T	T	C	T	C	C	C	C	C	T	C	T	C	T	T	T	T	T	T	T	T	T	T	T	T	T	T	T	T	T	T	T	T	T	T	T	Y	T	T	T	T	C	C	C
chr2D_16579032	C/G	2	16579032	0.852219	0.0165492	G	C	G	C	G	G	G	G	G	C	G	C	G	C	C	C	C	C	C	C	C	C	C	C	C	C	C	C	C	C	C	C	C	C	C	C	S	C	C	C	C	G	G	G
chr2D_16579081	A/T	2	16579081	0.852219	0.0165492	T	A	T	A	T	T	T	T	T	A	T	A	T	A	A	A	A	A	A	A	A	A	A	A	A	A	A	A	A	A	A	A	A	A	A	A	W	A	A	A	A	T	T	T
chr2D_16579269	G/A	2	16579269	-0.852219	0.0165492	G	G	A	G	A	A	A	A	A	G	A	G	A	G	G	G	G	G	G	G	G	G	G	G	G	G	G	G	G	G	G	G	G	G	G	G	R	G	G	G	G	A	A	A
chr2D_16579320	G/A	2	16579320	-0.852219	0.0165492	G	G	A	G	A	A	A	A	A	G	A	G	A	G	G	G	G	G	G	G	G	G	G	G	G	G	G	G	G	G	G	G	G	G	G	G	R	G	G	G	G	A	A	A
chr2D_16579366	A/G	2	16579366	0.84993	0.0168852	G	A	G	A	G	G	G	G	G	A	G	A	G	A	A	A	A	A	A	A	A	A	A	A	A	A	A	A	A	A	A	A	A	A	A	A	R	A	A	A	A	G	G	G
chr2D_16579417	A/G	2	16579417	0.852219	0.0165492	G	A	G	A	G	G	G	G	G	A	G	A	G	A	A	A	A	A	A	A	A	A	A	A	A	A	A	A	A	A	A	A	A	A	A	A	R	A	A	A	A	G	G	G
chr2D_16584892	C/A	2	16584892	-0.852219	0.0165492	C	C	A	C	A	A	A	A	A	C	A	C	A	C	C	C	C	C	C	C	C	C	C	C	C	C	C	C	C	C	C	C	C	C	C	C	M	C	C	C	C	A	A	A
chr2D_16585230	T/C	2	16585230	-0.852219	0.0165492	T	T	C	T	C	C	C	C	C	T	C	T	C	T	T	T	T	T	T	T	T	T	T	T	T	T	T	T	T	T	T	T	T	T	T	T	Y	T	T	T	T	C	C	C
chr2D_16586979	A/G	2	16586979	0.852219	0.0165492	G	A	G	A	G	G	G	G	G	A	G	A	G	A	A	A	A	A	A	A	A	A	A	A	A	A	A	A	A	A	A	A	A	A	A	A	R	A	A	A	A	G	G	G
chr2D_16587055	A/G	2	16587055	0.852219	0.0165492	G	A	G	A	G	G	G	G	G	A	G	A	G	A	A	A	A	A	A	A	A	A	A	A	A	A	A	A	A	A	A	A	A	A	A	A	R	A	A	A	A	G	G	G
chr2D_16587147	G/A	2	16587147	-0.852219	0.0165492	G	G	A	G	A	A	A	A	A	G	A	G	A	G	G	G	G	G	G	G	G	G	G	G	G	G	G	G	G	G	G	G	G	G	G	G	R	G	G	G	G	A	A	A
chr2D_16587279	T/G	2	16587279	-0.852219	0.0165492	T	T	G	T	G	G	G	G	G	T	G	T	G	T	T	T	T	T	T	T	T	T	T	T	T	T	T	T	T	T	T	T	T	T	T	T	K	T	T	T	T	G	G	G
chr2D_16587605	T/G	2	16587605	-0.84993	0.0168852	T	T	G	T	G	G	G	G	G	T	G	T	G	T	T	T	T	T	T	T	T	T	T	T	T	T	T	T	T	T	T	T	T	T	T	T	K	T	T	T	T	G	G	G
chr2D_16587838	A/G	2	16587838	0.84993	0.0168852	G	A	G	A	G	G	G	G	G	A	G	A	G	A	A	A	A	A	A	A	A	A	A	A	A	A	A	A	A	A	A	A	A	A	A	A	R	A	A	A	A	G	G	G
chr2D_16587858	A/G	2	16587858	0.852219	0.0165492	G	A	G	A	G	G	G	G	G	A	G	A	G	A	A	A	A	A	A	A	A	A	A	A	A	A	A	A	A	A	A	A	A	A	A	A	R	A	A	A	A	G	G	G
chr2D_16587981	T/C	2	16587981	-0.852219	0.0165492	T	T	C	T	C	C	C	C	C	T	C	T	C	T	T	T	T	T	T	T	T	T	T	T	T	T	T	T	T	T	T	T	T	T	T	T	Y	T	T	T	T	C	C	C
chr2D_16588059	A/G	2	16588059	0.852219	0.0165492	G	A	G	A	G	G	G	G	G	A	G	A	G	A	A	A	A	A	A	A	A	A	A	A	A	A	A	A	A	A	A	A	A	A	A	A	R	A	A	A	A	G	G	G
chr2D_16590530	A/C	2	16590530	0.852219	0.0165492	C	A	C	A	C	C	C	C	C	A	C	A	C	A	A	A	A	A	A	A	A	A	A	A	A	A	A	A	A	A	A	A	A	A	A	A	M	A	A	A	A	C	C	C
chr2D_16591796	G/T	2	16591796	0.84993	0.0168852	T	G	T	G	T	T	T	T	T	G	T	G	T	G	G	G	G	G	G	G	G	G	G	G	G	G	G	G	G	G	G	G	G	G	G	G	K	G	G	G	G	T	T	T
chr2D_16591803	A/G	2	16591803	0.852219	0.0165492	G	A	G	A	G	G	G	G	G	A	G	A	G	A	A	A	A	A	A	A	A	A	A	A	A	A	A	A	A	A	A	A	A	A	A	A	R	A	A	A	A	G	G	G
chr2D_16591807	G/A	2	16591807	-0.84993	0.0168852	G	G	A	G	A	A	A	A	A	G	A	G	A	G	G	G	G	G	G	G	G	G	G	G	G	G	G	G	G	G	G	G	G	G	G	G	R	G	G	G	G	A	A	A
chr2D_16592827	A/G	2	16592827	0.84993	0.0168852	G	A	G	A	G	G	G	G	G	A	G	A	G	A	A	A	A	A	A	A	A	A	A	A	A	A	A	A	A	A	A	A	A	A	A	A	R	A	A	A	A	G	G	G
chr2D_16592857	A/G	2	16592857	0.852219	0.0165492	G	A	G	A	G	G	G	G	G	A	G	A	G	A	A	A	A	A	A	A	A	A	A	A	A	A	A	A	A	A	A	A	A	A	A	A	R	A	A	A	A	G	G	G
chr2D_16594562	T/A	2	16594562	-0.852219	0.0165492	T	T	A	T	A	A	A	A	A	T	A	T	A	T	T	T	T	T	T	T	T	T	T	T	T	T	T	T	T	T	T	T	T	T	T	T	W	T	T	T	T	A	A	A
chr2D_16595918	G/A	2	16595918	-0.84993	0.0168852	G	G	A	G	A	A	A	A	A	G	A	G	A	G	G	G	G	G	G	G	G	G	G	G	G	G	G	G	G	G	G	G	G	G	G	G	R	G	G	G	G	A	A	A
chr2D_16595966	A/G	2	16595966	0.852219	0.0165492	G	A	G	A	G	G	G	G	G	A	G	A	G	A	A	A	A	A	A	A	A	A	A	A	A	A	A	A	A	A	A	A	A	A	A	A	R	A	A	A	A	G	G	G
chr2D_16597314	A/G	2	16597314	0.84993	0.0168852	G	A	G	A	G	G	G	G	G	A	G	A	G	A	A	A	A	A	A	A	A	A	A	A	A	A	A	A	A	A	A	A	A	A	A	A	R	A	A	A	A	G	G	G
chr2D_16597427	G/A	2	16597427	-0.852219	0.0165492	G	G	A	G	A	A	A	A	A	G	A	G	A	G	G	G	G	G	G	G	G	G	G	G	G	G	G	G	G	G	G	G	G	G	G	G	R	G	G	G	G	A	A	A
chr2D_16597454	T/C	2	16597454	-0.852219	0.0165492	T	T	C	T	C	C	C	C	C	T	C	T	C	T	T	T	T	T	T	T	T	T	T	T	T	T	T	T	T	T	T	T	T	T	T	T	Y	T	T	T	T	C	C	C
chr2D_16597705	A/G	2	16597705	0.852219	0.0165492	G	A	G	A	G	G	G	G	G	A	G	A	G	A	A	A	A	A	A	A	A	A	A	A	A	A	A	A	A	A	A	A	A	A	A	A	R	A	A	A	A	G	G	G
chr2D_16597906	C/A	2	16597906	-0.852219	0.0165492	C	C	A	C	A	A	A	A	A	C	A	C	A	C	C	C	C	C	C	C	C	C	C	C	C	C	C	C	C	C	C	C	C	C	C	C	M	C	C	C	C	A	A	A
chr2D_16598648	T/C	2	16598648	-0.852219	0.0165492	T	T	C	T	C	C	C	C	C	T	C	T	C	T	T	T	T	T	T	T	T	T	T	T	T	T	T	T	T	T	T	T	T	T	T	T	Y	T	T	T	T	C	C	C
chr2D_16599520	G/C	2	16599520	-0.84993	0.0168852	G	G	C	G	C	C	C	C	C	G	C	G	C	G	G	G	G	G	G	G	G	G	G	G	G	G	G	G	G	G	G	G	G	G	G	G	S	G	G	G	G	C	C	C
chr2D_16599728	T/G	2	16599728	-0.852219	0.0165492	T	T	G	T	G	G	G	G	G	T	G	T	G	T	T	T	T	T	T	T	T	T	T	T	T	T	T	T	T	T	T	T	T	T	T	T	K	T	T	T	T	G	G	G
chr2D_16600300	C/T	2	16600300	0.852219	0.0165492	T	C	T	C	T	T	T	T	T	C	T	C	T	C	C	C	C	C	C	C	C	C	C	C	C	C	C	C	C	C	C	C	C	C	C	C	Y	C	C	C	C	T	T	T
chr2D_16600543	T/C	2	16600543	-0.852219	0.0165492	T	T	C	T	C	C	C	C	C	T	C	T	C	T	T	T	T	T	T	T	T	T	T	T	T	T	T	T	T	T	T	T	T	T	T	T	Y	T	T	T	T	C	C	C
chr2D_16600887	T/C	2	16600887	-0.852219	0.0165492	T	T	C	T	C	C	C	C	C	T	C	T	C	T	T	T	T	T	T	T	T	T	T	T	T	T	T	T	T	T	T	T	T	T	T	T	Y	T	T	T	T	C	C	C
chr2D_16601052	C/G	2	16601052	0.852219	0.0165492	G	C	G	C	G	G	G	G	G	C	G	C	G	C	C	C	C	C	C	C	C	C	C	C	C	C	C	C	C	C	C	C	C	C	C	C	S	C	C	C	C	G	G	G
chr2D_16601206	G/C	2	16601206	-0.852219	0.0165492	G	G	C	G	C	C	C	C	C	G	C	G	C	G	G	G	G	G	G	G	G	G	G	G	G	G	G	G	G	G	G	G	G	G	G	G	S	G	G	G	G	C	C	C
chr2D_16601327	G/A	2	16601327	-0.852219	0.0165492	G	G	A	G	A	A	A	A	A	G	A	G	A	G	G	G	G	G	G	G	G	G	G	G	G	G	G	G	G	G	G	G	G	G	G	G	R	G	G	G	G	A	A	A
chr2D_16610578	T/C	2	16610578	-0.852219	0.0165492	T	T	C	T	C	C	C	C	C	T	C	T	C	T	T	T	T	T	T	T	T	T	T	T	T	T	T	T	T	T	T	T	T	T	T	T	Y	T	T	T	T	C	C	C
chr2D_16610607	A/G	2	16610607	0.852219	0.0165492	G	A	G	A	G	G	G	G	G	A	G	A	G	A	A	A	A	A	A	A	A	A	A	A	A	A	A	A	A	A	A	A	A	A	A	A	R	A	A	A	A	G	G	G
chr2D_16610634	T/C	2	16610634	-0.852219	0.0165492	T	T	C	T	C	C	C	C	C	T	C	T	C	T	T	T	T	T	T	T	T	T	T	T	T	T	T	T	T	T	T	T	T	T	T	T	Y	T	T	T	T	C	C	C
chr2D_16611105	A/G	2	16611105	0.852219	0.0165492	G	A	G	A	G	G	G	G	G	A	G	A	G	A	A	A	A	A	A	A	A	A	A	A	A	A	A	A	A	A	A	A	A	A	A	A	R	A	A	A	A	G	G	G
chr2D_16612571	A/C	2	16612571	0.852219	0.0165492	C	A	C	A	C	C	C	C	C	A	C	A	C	A	A	A	A	A	A	A	A	A	A	A	A	A	A	A	A	A	A	A	A	A	A	A	M	A	A	A	A	C	C	C
chr2D_16612575	A/G	2	16612575	0.852219	0.0165492	G	A	G	A	G	G	G	G	G	A	G	A	G	A	A	A	A	A	A	A	A	A	A	A	A	A	A	A	A	A	A	A	A	A	A	A	R	A	A	A	A	G	G	G
chr2D_16614902	A/G	2	16614902	0.852219	0.0165492	G	A	G	A	G	G	G	G	G	A	G	A	G	A	A	A	A	A	A	A	A	A	A	A	A	A	A	A	A	A	A	A	A	A	A	A	R	A	A	A	A	G	G	G
chr2D_16614913	G/C	2	16614913	-0.852219	0.0165492	G	G	C	G	C	C	C	C	C	G	C	G	C	G	G	G	G	G	G	G	G	G	G	G	G	G	G	G	G	G	G	G	G	G	G	G	S	G	G	G	G	C	C	C
chr2D_16614958	A/G	2	16614958	0.852219	0.0165492	G	A	G	A	G	G	G	G	G	A	G	A	G	A	A	A	A	A	A	A	A	A	A	A	A	A	A	A	A	A	A	A	A	A	A	A	R	A	A	A	A	G	G	G
chr2D_16615661	A/G	2	16615661	0.852219	0.0165492	G	A	G	A	G	G	G	G	G	A	G	A	G	A	A	A	A	A	A	A	A	A	A	A	A	A	A	A	A	A	A	A	A	A	A	A	R	A	A	A	A	G	G	G
chr2D_16615706	A/C	2	16615706	0.852219	0.0165492	C	A	C	A	C	C	C	C	C	A	C	A	C	A	A	A	A	A	A	A	A	A	A	A	A	A	A	A	A	A	A	A	A	A	A	A	M	A	A	A	A	C	C	C
chr2D_16615740	A/G	2	16615740	0.852219	0.0165492	G	A	G	A	G	G	G	G	G	A	G	A	G	A	A	A	A	A	A	A	A	A	A	A	A	A	A	A	A	A	A	A	A	A	A	A	R	A	A	A	A	G	G	G
chr2D_16619216	C/A	2	16619216	-0.84993	0.0168852	C	C	A	C	A	A	A	A	A	C	A	C	A	C	C	C	C	C	C	C	C	C	C	C	C	C	C	C	C	C	C	C	C	C	C	C	M	C	C	C	C	A	A	A
chr2D_16619230	A/G	2	16619230	0.852219	0.0165492	G	A	G	A	G	G	G	G	G	A	G	A	G	A	A	A	A	A	A	A	A	A	A	A	A	A	A	A	A	A	A	A	A	A	A	A	R	A	A	A	A	G	G	G
chr2D_16620226	A/G	2	16620226	0.852219	0.0165492	G	A	G	A	G	G	G	G	G	A	G	A	G	A	A	A	A	A	A	A	A	A	A	A	A	A	A	A	A	A	A	A	A	A	A	A	R	A	A	A	A	G	G	G
chr2D_16620508	A/G	2	16620508	0.852219	0.0165492	G	A	G	A	G	G	G	G	G	A	G	A	G	A	A	A	A	A	A	A	A	A	A	A	A	A	A	A	A	A	A	A	A	A	A	A	R	A	A	A	A	G	G	G
chr2D_16620510	T/C	2	16620510	-0.852219	0.0165492	T	T	C	T	C	C	C	C	C	T	C	T	C	T	T	T	T	T	T	T	T	T	T	T	T	T	T	T	T	T	T	T	T	T	T	T	Y	T	T	T	T	C	C	C
chr2D_16620599	A/G	2	16620599	0.852219	0.0165492	G	A	G	A	G	G	G	G	G	A	G	A	G	A	A	A	A	A	A	A	A	A	A	A	A	A	A	A	A	A	A	A	A	A	A	A	R	A	A	A	A	G	G	G
chr2D_16625766	A/G	2	16625766	0.852219	0.0165492	G	A	G	A	G	G	G	G	G	A	G	A	G	A	A	A	A	A	A	A	A	A	A	A	A	A	A	A	A	A	A	A	A	A	A	A	R	A	A	A	A	G	G	G
chr2D_16625855	C/T	2	16625855	0.84993	0.0168852	T	C	T	C	T	T	T	T	T	C	T	C	T	C	C	C	C	C	C	C	C	C	C	C	C	C	C	C	C	C	C	C	C	C	C	C	Y	C	C	C	C	T	T	T
chr2D_16625882	C/T	2	16625882	0.84993	0.0168852	T	C	T	C	T	T	T	T	T	C	T	C	T	C	C	C	C	C	C	C	C	C	C	C	C	C	C	C	C	C	C	C	C	C	C	C	Y	C	C	C	C	T	T	T
chr2D_16625895	A/G	2	16625895	0.852219	0.0165492	G	A	G	A	G	G	G	G	G	A	G	A	G	A	A	A	A	A	A	A	A	A	A	A	A	A	A	A	A	A	A	A	A	A	A	A	R	A	A	A	A	G	G	G
chr2D_16625923	A/G	2	16625923	0.852219	0.0165492	G	A	G	A	G	G	G	G	G	A	G	A	G	A	A	A	A	A	A	A	A	A	A	A	A	A	A	A	A	A	A	A	A	A	A	A	R	A	A	A	A	G	G	G
chr2D_16627973	G/A	2	16627973	-0.852219	0.0165492	G	G	A	G	A	A	A	A	A	G	A	G	A	G	G	G	G	G	G	G	G	G	G	G	G	G	G	G	G	G	G	G	G	G	G	G	R	G	G	G	G	A	A	A
chr2D_16628366	A/G	2	16628366	0.852219	0.0165492	G	A	G	A	G	G	G	G	G	A	G	A	G	A	A	A	A	A	A	A	A	A	A	A	A	A	A	A	A	A	A	A	A	A	A	A	R	A	A	A	A	G	G	G
chr2D_16628428	T/A	2	16628428	-0.852219	0.0165492	T	T	A	T	A	A	A	A	A	T	A	T	A	T	T	T	T	T	T	T	T	T	T	T	T	T	T	T	T	T	T	T	T	T	T	T	W	T	T	T	T	A	A	A
chr2D_16633328	C/T	2	16633328	0.84993	0.0168852	T	C	T	C	T	T	T	T	T	C	T	C	T	C	C	C	C	C	C	C	C	C	C	C	C	C	C	C	C	C	C	C	C	C	C	C	Y	C	C	C	C	T	T	T
chr2D_16635669	C/T	2	16635669	0.84993	0.0168852	T	C	T	C	T	T	T	T	T	C	T	C	T	C	C	C	C	C	C	C	C	C	C	C	C	C	C	C	C	C	C	C	C	C	C	C	Y	C	C	C	C	T	T	T
chr2D_16639561	G/A	2	16639561	-0.84993	0.0168852	G	G	A	G	A	A	A	A	A	G	A	G	A	G	G	G	G	G	G	G	G	G	G	G	G	G	G	G	G	G	G	G	G	G	G	G	R	G	G	G	G	A	A	A
chr4D_459271685	T/A	4	459271685	1.31813	0.0229622	T	W/A	T	W	T	T	T	A	W	T	T	A	T	W	T	A	T	T	T	T	T	T	T	T	T	T	T	T	T	T	T	W	W	W	A	W	W	W	W	W	W	T	T	T
chr4D_459272042	C/G	4	459272042	-1.31813	0.0229622	G	S/G	C	S	C	C	C	G	S	C	C	G	C	S	C	G	C	C	C	C	C	C	C	C	C	C	C	C	C	C	C	S	S	S	G	S	S	S	S	S	S	C	C	C
chr4D_459272169	A/G	4	459272169	-1.31813	0.0229622	G	R/G	A	R	A	A	A	G	R	A	A	G	A	R	A	G	A	A	A	A	A	A	A	A	A	A	A	A	A	A	A	R	R	R	G	R	R	R	R	R	R	A	A	A
chr4D_459272191	C/A	4	459272191	1.31813	0.0229622	C	M/A	C	M	C	C	C	A	M	C	C	A	C	M	C	A	C	C	C	C	C	C	C	C	C	C	C	C	C	C	C	M	M	M	A	M	M	M	M	M	M	C	C	C
chr4D_459272198	T/G	4	459272198	1.31813	0.0229622	T	K/G	T	K	T	T	T	G	K	T	T	G	T	K	T	G	T	T	T	T	T	T	T	T	T	T	T	T	T	T	T	K	K	K	G	K	K	K	K	K	K	T	T	T
chr4D_459272235	A/G	4	459272235	-1.31813	0.0229622	G	R/G	A	R	A	A	A	G	R	A	A	G	A	R	A	G	A	A	A	A	A	A	A	A	A	A	A	A	A	A	A	R	R	R	G	R	R	R	R	R	R	A	A	A
chr4D_459272250	A/G	4	459272250	-1.31813	0.0229622	G	R/G	A	R	A	A	A	G	R	A	A	G	A	R	A	G	A	A	A	A	A	A	A	A	A	A	A	A	A	A	A	R	R	R	G	R	R	R	R	R	R	A	A	A
chr4D_459272301	A/G	4	459272301	-1.31813	0.0229622	G	R/G	A	R	A	A	A	G	R	A	A	G	A	R	A	G	A	A	A	A	A	A	A	A	A	A	A	A	A	A	A	R	R	R	G	R	R	R	R	R	R	A	A	A
chr4D_459272507	G/A	4	459272507	1.31813	0.0229622	G	R/A	G	R	G	G	G	A	R	G	G	A	G	R	G	A	G	G	G	G	G	G	G	G	G	G	G	G	G	G	G	R	R	R	A	R	R	R	R	R	R	G	G	G
[truncated: 331 more columns]

## Sheet: Transposed_with_Hdate_data
rs	chr2D_16574050	chr2D_16574159	chr2D_16574210	chr2D_16574497	chr2D_16574514	chr2D_16574517	chr2D_16574569	chr2D_16574715	chr2D_16575276	chr2D_16575283	chr2D_16575550	chr2D_16575596	chr2D_16575620	chr2D_16575662	chr2D_16575799	chr2D_16576064	chr2D_16576134	chr2D_16576431	chr2D_16576520	chr2D_16576687	chr2D_16576810	chr2D_16577220	chr2D_16577410	chr2D_16577558	chr2D_16577627	chr2D_16577685	chr2D_16577890	chr2D_16578059	chr2D_16578063	chr2D_16578150	chr2D_16578397	chr2D_16578670	chr2D_16578720	chr2D_16578840	chr2D_16578867	chr2D_16578870	chr2D_16578903	chr2D_16578953	chr2D_16578968	chr2D_16578982	chr2D_16579032	chr2D_16579081	chr2D_16579269	chr2D_16579320	chr2D_16579366	chr2D_16579417	chr2D_16584892	chr2D_16585230	chr2D_16586979
alleles	T/C	T/A	A/G	G/C	T/C	T/C	A/C	A/G	A/C	A/G	T/A	C/G	A/T	G/T	C/T	C/G	A/C	A/G	G/A	C/A	A/G	G/A	G/T	G/A	C/G	A/G	A/G	C/T	G/A	C/A	A/T	C/G	T/G	T/G	C/T	G/A	G/C	T/G	T/G	T/C	C/G	A/T	G/A	G/A	A/G	A/G	C/A	T/C	A/G
chrom	2	2	2	2	2	2	2	2	2	2	2	2	2	2	2	2	2	2	2	2	2	2	2	2	2	2	2	2	2	2	2	2	2	2	2	2	2	2	2	2	2	2	2	2	2	2	2	2	2
pos	16574050	16574159	16574210	16574497	16574514	16574517	16574569	16574715	16575276	16575283	16575550	16575596	16575620	16575662	16575799	16576064	16576134	16576431	16576520	16576687	16576810	16577220	16577410	16577558	16577627	16577685	16577890	16578059	16578063	16578150	16578397	16578670	16578720	16578840	16578867	16578870	16578903	16578953	16578968	16578982	16579032	16579081	16579269	16579320	16579366	16579417	16584892	16585230	16586979
Allele_effect	-0.852219	-0.852219	0.852219	-0.852219	-0.852219	-0.852219	0.852219	0.852219	-0.865528	0.852219	-0.865528	-0.865528	0.852219	0.852219	0.852219	0.865528	0.852219	0.852219	-0.852219	-0.852219	0.852219	-0.852219	0.852219	-0.852219	0.852219	0.852219	0.84993	0.852219	-0.84993	-0.852219	0.852219	0.852219	-0.852219	-0.852219	0.852219	-0.852219	-0.852219	-0.852219	-0.852219	-0.852219	0.852219	0.852219	-0.852219	-0.852219	0.84993	0.852219	-0.852219	-0.852219	0.852219
FDR_Pvalue	0.0165492	0.0165492	0.0165492	0.0165492	0.0165492	0.0165492	0.0165492	0.0165492	0.0165492	0.0165492	0.0165492	0.0165492	0.0165492	0.0165492	0.0165492	0.0165492	0.0165492	0.0165492	0.0165492	0.0165492	0.0165492	0.0165492	0.0165492	0.0165492	0.0165492	0.0165492	0.0168852	0.0165492	0.0168852	0.0165492	0.0165492	0.0165492	0.0165492	0.0165492	0.0165492	0.0165492	0.0165492	0.0165492	0.0165492	0.0165492	0.0165492	0.0165492	0.0165492	0.0165492	0.0168852	0.0165492	0.0165492	0.0165492	0.0165492
Effect_allele	T	T	G	G	T	T	C	G	C	G	T	G	T	T	T	G	C	G	G	C	G	G	T	G	G	G	G	T	G	C	T	G	T	T	T	G	G	T	T	T	G	T	G	G	G	G	C	T	G
Reducing_Haplotype	T	T	A	G	T	T	A	A	C	A	T	G	A	G	C	C	A	A	G	C	A	G	G	G	C	A	A	C	G	C	A	C	T	T	C	G	G	T	T	T	C	A	G	G	A	A	C	T	A
Increasing_Haplotype	C	A	G	C	C	C	C	G	A	G	A	C	T	T	T	G	C	G	A	A	G	A	T	A	G	G	G	T	A	A	T	G	G	G	T	A	C	G	G	C	G	T	A	A	G	G	A	C	G
103_3	T	T	A	G	T	T	A	A	C	A	T	G	A	G	C	C	A	A	G	C	A	G	G	G	C	A	A	C	G	C	A	C	T	T	C	G	G	T	T	T	C	A	G	G	A	A	C	T	A
103_4	T	T	A	G	T	T	A	A	C	A	T	G	A	G	C	C	A	A	G	C	A	G	G	G	C	A	A	C	G	C	A	C	T	T	C	G	G	T	T	T	C	A	G	G	A	A	C	T	A
103_5	C	A	G	C	C	C	C	G	A	G	A	C	T	T	T	G	C	G	A	A	G	A	T	A	G	G	G	T	A	A	T	G	G	G	T	A	C	G	G	C	G	T	A	A	G	G	A	C	G
104_1	T	T	A	G	T	T	A	A	C	A	T	G	A	G	C	C	A	A	G	C	A	G	G	G	C	A	A	C	G	C	A	C	T	T	C	G	G	T	T	T	C	A	G	G	A	A	C	T	A
104_10	T	T	A	G	T	T	A	A	C	A	T	G	A	G	C	C	A	A	G	C	A	G	G	G	C	A	A	C	G	C	A	C	T	T	C	G	G	T	T	T	C	A	G	G	A	A	C	T	A
104_11	T	T	A	G	T	T	A	A	C	A	T	G	A	G	C	C	A	A	G	C	A	G	G	G	C	A	A	C	G	C	A	C	T	T	C	G	G	T	T	T	C	A	G	G	A	A	C	T	A
104_12	T	T	A	G	T	T	A	A	C	A	T	G	A	G	C	C	A	A	G	C	A	G	G	G	C	A	A	C	G	C	A	C	T	T	C	G	G	T	T	T	C	A	G	G	A	A	C	T	A
104_13	T	T	A	G	T	T	A	A	C	A	T	G	A	G	C	C	A	A	G	C	A	G	G	G	C	A	A	C	G	C	A	C	T	T	C	G	G	T	T	T	C	A	G	G	A	A	C	T	A
104_14	T	T	A	G	T	T	A	A	C	A	T	G	A	G	C	C	A	A	G	C	A	G	G	G	C	A	A	C	G	C	A	C	T	T	C	G	G	T	T	T	C	A	G	G	A	A	C	T	A
104_3	T	T	A	G	T	T	A	A	C	A	T	G	A	G	C	C	A	A	G	C	A	G	G	G	C	A	A	C	G	C	A	C	T	T	C	G	G	T	T	T	C	A	G	G	A	A	C	T	A
104_4	T	T	A	G	T	T	A	A	C	A	T	G	A	G	C	C	A	A	G	C	A	G	G	G	C	A	A	C	G	C	A	C	T	T	C	G	G	T	T	T	C	A	G	G	A	A	C	T	A
104_5	T	T	A	G	T	T	A	A	C	A	T	G	A	G	C	C	A	A	G	C	A	G	G	G	C	A	A	C	G	C	A	C	T	T	C	G	G	T	T	T	C	A	G	G	A	A	C	T	A
104_6	T	T	A	G	T	T	A	A	C	A	T	G	A	G	C	C	A	A	G	C	A	G	G	G	C	A	A	C	G	C	A	C	T	T	C	G	G	T	T	T	C	A	G	G	A	A	C	T	A
104_8	T	T	A	G	T	T	A	A	C	A	T	G	A	G	C	C	A	A	G	C	A	G	G	G	C	A	A	C	G	C	A	C	T	T	C	G	G	T	T	T	C	A	G	G	A	A	C	T	A
104_9	T	T	A	G	T	T	A	A	C	A	T	G	A	G	C	C	A	A	G	C	A	G	G	G	C	A	A	C	G	C	A	C	T	T	C	G	G	T	T	T	C	A	G	G	A	A	C	T	A
106_1	C	A	G	C	C	C	C	G	A	G	A	C	T	T	T	G	C	G	A	A	G	A	T	A	G	G	G	T	A	A	T	G	G	G	T	A	C	G	G	C	G	T	A	A	G	G	A	C	G
106_11	T	T	A	G	T	T	A	A	C	A	T	G	A	G	C	C	A	A	G	C	A	G	G	G	C	A	A	C	G	C	A	C	T	T	C	G	G	T	T	T	C	A	G	G	A	A	C	T	A
106_13	T	T	A	G	T	T	A	A	C	A	T	G	A	G	C	C	A	A	G	C	A	G	G	G	C	A	A	C	G	C	A	C	T	T	C	G	G	T	T	T	C	A	G	G	A	A	C	T	A
106_4	T	T	A	G	T	T	A	A	C	A	T	G	A	G	C	C	A	A	G	C	A	G	G	G	C	A	A	C	G	C	A	C	T	T	C	G	G	T	T	T	C	A	G	G	A	A	C	T	A
106_8	T	T	A	G	T	T	A	A	C	A	T	G	A	G	C	C	A	A	G	C	A	G	G	G	C	A	A	C	G	C	A	C	T	T	C	G	G	T	T	T	C	A	G	G	A	A	C	T	A
107_5	Y	W	R	S	Y	Y	M	R	M	R	W	S	W	K	Y	S	M	R	R	M	R	R	K	R	S	R	R	Y	R	M	W	S	K	K	Y	R	S	K	K	Y	S	W	R	R	R	R	M	Y	R
108_1	C	A	G	C	C	C	C	G	A	G	A	C	T	T	T	G	C	G	A	A	G	A	T	A	G	G	G	T	A	A	T	G	G	G	T	A	C	G	G	C	G	T	A	A	G	G	A	C	G
108_10	C	A	G	C	C	C	C	G	A	G	A	C	T	T	T	G	C	G	A	A	G	A	T	A	G	G	G	T	A	A	T	G	G	G	T	A	C	G	G	C	G	T	A	A	G	G	A	C	G
108_4	C	A	G	C	C	C	C	G	A	G	A	C	T	T	T	G	C	G	A	A	G	A	T	A	G	G	G	T	A	A	T	G	G	G	T	A	C	G	G	C	G	T	A	A	G	G	A	C	G
108_5	C	A	G	C	C	C	C	G	A	G	A	C	T	T	T	G	C	G	A	A	G	A	T	A	G	G	G	T	A	A	T	G	G	G	T	A	C	G	G	C	G	T	A	A	G	G	A	C	G
108_8	C	A	G	C	C	C	C	G	A	G	A	C	T	T	T	G	C	G	A	A	G	A	T	A	G	G	G	T	A	A	T	G	G	G	T	A	C	G	G	C	G	T	A	A	G	G	A	C	G
109_10	T	T	A	G	T	T	A	A	C	A	T	G	A	G	C	C	A	A	G	C	A	G	G	G	C	A	A	C	G	C	A	C	T	T	C	G	G	T	T	T	C	A	G	G	A	A	C	T	A
109_18	T	T	A	G	T	T	A	A	C	A	T	G	A	G	C	C	A	A	G	C	A	G	G	G	C	A	A	C	G	C	A	C	T	T	C	G	G	T	T	T	C	A	G	G	A	A	C	T	A
109_2	Y	W	R	S	Y	Y	M	R	M	R	W	S	W	K	Y	S	M	R	R	M	R	R	K	R	S	R	R	Y	R	M	W	S	K	K	Y	R	S	K	K	Y	S	W	R	R	R	R	M	Y	R
109_24	T	T	A	G	T	T	A	A	C	A	T	G	A	G	C	C	A	A	G	C	A	G	G	G	C	A	A	C	G	C	A	C	T	T	C	G	G	T	T	T	C	A	G	G	A	A	C	T	A
109_25	T	T	A	G	T	T	A	A	C	A	T	G	A	G	C	C	A	A	G	C	A	G	G	G	C	A	A	C	G	C	A	C	T	T	C	G	G	T	T	T	C	A	G	G	A	A	C	T	A
109_4	T	T	A	G	T	T	A	A	C	A	T	G	A	G	C	C	A	A	G	C	A	G	G	G	C	A	A	C	G	C	A	C	T	T	C	G	G	T	T	T	C	A	G	G	A	A	C	T	A
109_6	T	T	A	G	T	T	A	A	C	A	T	G	A	G	C	C	A	A	G	C	A	G	G	G	C	A	A	C	G	C	A	C	T	T	C	G	G	T	T	T	C	A	G	G	A	A	C	T	A
109_9	T	T	A	G	T	T	A	A	C	A	T	G	A	G	C	C	A	A	G	C	A	G	G	G	C	A	A	C	G	C	A	C	T	T	C	G	G	T	T	T	C	A	G	G	A	A	C	T	A
110_1	T	T	A	G	T	T	A	A	C	A	T	G	A	G	C	C	A	A	G	C	A	G	G	G	C	A	A	C	G	C	A	C	T	T	C	G	G	T	T	T	C	A	G	G	A	A	C	T	A
110_2	Y	W	R	S	Y	Y	M	R	M	R	W	S	W	K	Y	S	M	R	R	M	R	R	K	R	S	R	R	Y	R	M	W	S	K	K	Y	R	S	K	K	Y	S	W	R	R	R	R	M	Y	R
110_4	C	A	G	C	C	C	C	G	A	G	A	C	T	T	T	G	C	G	A	A	G	A	T	A	G	G	G	T	A	A	T	G	G	G	T	A	C	G	G	C	G	T	A	A	G	G	A	C	G
110_5	T	T	A	G	T	T	A	A	C	A	T	G	A	G	C	C	A	A	G	C	A	G	G	G	C	A	A	C	G	C	A	C	T	T	C	G	G	T	T	T	C	A	G	G	A	A	C	T	A
110_6	Y	W	R	S	Y	Y	M	R	M	R	W	S	W	K	Y	S	M	R	R	M	R	R	K	R	S	R	R	Y	R	M	W	S	K	K	Y	R	S	K	K	Y	S	W	R	R	R	R	M	Y	R
111_10	T	T	A	G	T	T	A	A	C	A	T	G	A	G	C	C	A	A	G	C	A	G	G	G	C	A	A	C	G	C	A	C	T	T	C	G	G	T	T	T	C	A	G	G	A	A	C	T	A
111_15	T	T	A	G	T	T	A	A	C	A	T	G	A	G	C	C	A	A	G	C	A	G	G	G	C	A	A	C	G	C	A	C	T	T	C	G	G	T	T	T	C	A	G	G	A	A	C	T	A
111_16	T	T	A	G	T	T	A	A	C	A	T	G	A	G	C	C	A	A	G	C	A	G	G	G	C	A	A	C	G	C	A	C	T	T	C	G	G	T	T	T	C	A	G	G	A	A	C	T	A
111_20	T	T	A	G	T	T	A	A	C	A	T	G	A	G	C	C	A	A	G	C	A	G	G	G	C	A	A	C	G	C	A	C	T	T	C	G	G	T	T	T	C	A	G	G	A	A	C	T	A
111_3	C	A	G	C	C	C	C	G	A	G	A	C	T	T	T	G	C	G	A	A	G	A	T	A	G	G	G	T	A	A	T	G	G	G	T	A	C	G	G	C	G	T	A	A	G	G	A	C	G
112_3	T	T	A	G	T	T	A	A	C	A	T	G	A	G	C	C	A	A	G	C	A	G	G	G	C	A	A	C	G	C	A	C	T	T	C	G	G	T	T	T	C	A	G	G	A	A	C	T	A
114_6	C	A	G	C	C	C	C	G	A	G	A	C	T	T	T	G	C	G	A	A	G	A	T	A	G	G	G	T	A	A	T	G	G	G	T	A	C	G	G	C	G	T	A	A	G	G	A	C	G
121_5	C	A	G	C	C	C	C	G	A	G	A	C	T	T	T	G	C	G	A	A	G	A	T	A	G	G	G	T	A	A	T	G	G	G	T	A	C	G	G	C	G	T	A	A	G	G	A	C	G
121_6	C	A	G	C	C	C	C	G	A	G	A	C	T	T	T	G	C	G	A	A	G	A	T	A	G	G	G	T	A	A	T	G	G	G	T	A	C	G	G	C	G	T	A	A	G	G	A	C	G
122_2	C	A	G	C	C	C	C	G	A	G	A	C	T	T	T	G	C	G	A	A	G	A	T	A	G	G	G	T	A	A	T	G	G	G	T	A	C	G	G	C	G	T	A	A	G	G	A	C	G
122_3	C	A	G	C	C	C	C	G	A	G	A	C	T	T	T	G	C	G	A	A	G	A	T	A	G	G	G	T	A	A	T	G	G	G	T	A	C	G	G	C	G	T	A	A	G	G	A	C	G
92_10	T	T	A	G	T	T	A	A	C	A	T	G	A	G	C	C	A	A	G	C	A	G	G	G	C	A	A	C	G	C	A	C	T	T	C	G	G	T	T	T	C	A	G	G	A	A	C	T	A
92_2	T	T	A	G	T	T	A	A	C	A	T	G	A	G	C	C	A	A	G	C	A	G	G	G	C	A	A	C	G	C	A	C	T	T	C	G	G	T	T	T	C	A	G	G	A	A	C	T	A
92_4	T	T	A	G	T	T	A	A	C	A	T	G	A	G	C	C	A	A	G	C	A	G	G	G	C	A	A	C	G	C	A	C	T	T	C	G	G	T	T	T	C	A	G	G	A	A	C	T	A
92_9	T	T	A	G	T	T	A	A	C	A	T	G	A	G	C	C	A	A	G	C	A	G	G	G	C	A	A	C	G	C	A	C	T	T	C	G	G	T	T	T	C	A	G	G	A	A	C	T	A
93_11	T	T	A	G	T	T	A	A	C	A	T	G	A	G	C	C	A	A	G	C	A	G	G	G	C	A	A	C	G	C	A	C	T	T	C	G	G	T	T	T	C	A	G	G	A	A	C	T	A
93_14	T	T	A	G	T	T	A	A	C	A	T	G	A	G	C	C	A	A	G	C	A	G	G	G	C	A	A	C	G	C	A	C	T	T	C	G	G	T	T	T	C	A	G	G	A	A	C	T	A
93_17	T	T	A	G	T	T	A	A	C	A	T	G	A	G	C	C	A	A	G	C	A	G	G	G	C	A	A	C	G	C	A	C	T	T	C	G	G	T	T	T	C	A	G	G	A	A	C	T	A
94_12	T	T	A	G	T	T	A	A	C	A	T	G	A	G	C	C	A	A	G	C	A	G	G	G	C	A	A	C	G	C	A	C	T	T	C	G	G	T	T	T	C	A	G	G	A	A	C	T	A
94_13	C	A	G	C	C	C	C	G	A	G	A	C	T	T	T	G	C	G	A	A	G	A	T	A	G	G	G	T	A	A	T	G	G	G	T	A	C	G	G	C	G	T	A	A	G	G	A	C	G
94_22	C	A	G	C	C	C	C	G	A	G	A	C	T	T	T	G	C	G	A	A	G	A	T	A	G	G	G	T	A	A	T	G	G	G	T	A	C	G	G	C	G	T	A	A	G	G	A	C	G
94_24	T	T	A	G	T	T	A	A	C	A	T	G	A	G	C	C	A	A	G	C	A	G	G	G	C	A	A	C	G	C	A	C	T	T	C	G	G	T	T	T	C	A	G	G	A	A	C	T	A
94_8	T	T	A	G	T	T	A	A	C	A	T	G	A	G	C	C	A	A	G	C	A	G	G	G	C	A	A	C	G	C	A	C	T	T	C	G	G	T	T	T	C	A	G	G	A	A	C	T	A
94_9	T	T	A	G	T	T	A	A	C	A	T	G	A	G	C	C	A	A	G	C	A	G	G	G	C	A	A	C	G	C	A	C	T	T	C	G	G	T	T	T	C	A	G	G	A	A	C	T	A
96_13	T	T	A	G	T	T	A	A	C	A	T	G	A	G	C	C	A	A	G	C	A	G	G	G	C	A	A	C	G	C	A	C	T	T	C	G	G	T	T	T	C	A	G	G	A	A	C	T	A
96_16	T	T	A	G	T	T	A	A	C	A	T	G	A	G	C	C	A	A	G	C	A	G	G	G	C	A	A	C	G	C	A	C	T	T	C	G	G	T	T	T	C	A	G	G	A	A	C	T	A
97_5	C	A	G	C	C	C	C	G	A	G	A	C	T	T	T	G	C	G	A	A	G	A	T	A	G	G	G	T	A	A	T	G	G	G	T	A	C	G	G	C	G	T	A	A	G	G	A	C	G
98_1	T	T	A	G	T	T	A	A	C	A	T	G	A	G	C	C	A	A	G	C	A	G	G	G	C	A	A	C	G	C	A	C	T	T	C	G	G	T	T	T	C	A	G	G	A	A	C	T	A
98_12	T	T	A	G	T	T	A	A	C	A	T	G	A	G	C	C	A	A	G	C	A	G	G	G	C	A	A	C	G	C	A	C	T	T	C	G	G	T	T	T	C	A	G	G	A	A	C	T	A
98_13	T	T	A	G	T	T	A	A	C	A	T	G	A	G	C	C	A	A	G	C	A	G	G	G	C	A	A	C	G	C	A	C	T	T	C	G	G	T	T	T	C	A	G	G	A	A	C	T	A
98_16	T	T	A	G	T	T	A	A	C	A	T	G	A	G	C	C	A	A	G	C	A	G	G	G	C	A	A	C	G	C	A	C	T	T	C	G	G	T	T	T	C	A	G	G	A	A	C	T	A
98_5	T	T	A	G	T	T	A	A	C	A	T	G	A	G	C	C	A	A	G	C	A	G	G	G	C	A	A	C	G	C	A	C	T	T	C	G	G	T	T	T	C	A	G	G	A	A	C	T	A
99_10	T	T	A	G	T	T	A	A	C	A	T	G	A	G	C	C	A	A	G	C	A	G	G	G	C	A	A	C	G	C	A	C	T	T	C	G	G	T	T	T	C	A	G	G	A	A	C	T	A
99_19	T	T	A	G	T	T	A	A	C	A	T	G	A	G	C	C	A	A	G	C	A	G	G	G	C	A	A	C	G	C	A	C	T	T	C	G	G	T	T	T	C	A	G	G	A	A	C	T	A
99_4	T	T	A	G	T	T	A	A	C	A	T	G	A	G	C	C	A	A	G	C	A	G	G	G	C	A	A	C	G	C	A	C	T	T	C	G	G	T	T	T	C	A	G	G	A	A	C	T	A
KS061406LN_26	C	A	G	C	C	C	C	G	A	G	A	C	T	T	T	G	C	G	A	A	G	A	T	A	G	G	A	T	G	A	T	G	G	G	T	A	C	G	G	C	G	T	A	A	A	G	A	C	G
100_1	C	A	G	C	C	C	C	G	A	G	A	C	T	T	T	G	C	G	A	A	G	A	T	A	G	G	G	T	A	A	T	G	G	G	T	A	C	G	G	C	G	T	A	A	G	G	A	C	G
100_2	C	A	G	C	C	C	C	G	A	G	A	C	T	T	T	G	C	G	A	A	G	A	T	A	G	G	G	T	A	A	T	G	G	G	T	A	C	G	G	C	G	T	A	A	G	G	A	C	G
103_6	C	A	G	C	C	C	C	G	A	G	A	C	T	T	T	G	C	G	A	A	G	A	T	A	G	G	G	T	A	A	T	G	G	G	T	A	C	G	G	C	G	T	A	A	G	G	A	C	G
103_7	T	T	A	G	T	T	A	A	C	A	T	G	A	G	C	C	A	A	G	C	A	G	G	G	C	A	A	C	G	C	A	C	T	T	C	G	G	T	T	T	C	A	G	G	A	A	C	T	A
104_2	T	T	A	G	T	T	A	A	C	A	T	G	A	G	C	C	A	A	G	C	A	G	G	G	C	A	A	C	G	C	A	C	T	T	C	G	G	T	T	T	C	A	G	G	A	A	C	T	A
104_7	T	T	A	G	T	T	A	A	C	A	T	G	A	G	C	C	A	A	G	C	A	G	G	G	C	A	A	C	G	C	A	C	T	T	C	G	G	T	T	T	C	A	G	G	A	A	C	T	A
106_10	T	T	A	G	T	T	A	A	C	A	T	G	A	G	C	C	A	A	G	C	A	G	G	G	C	A	A	C	G	C	A	C	T	T	C	G	G	T	T	T	C	A	G	G	A	A	C	T	A
106_12	T	T	A	G	T	T	A	A	C	A	T	G	A	G	C	C	A	A	G	C	A	G	G	G	C	A	A	C	G	C	A	C	T	T	C	G	G	T	T	T	C	A	G	G	A	A	C	T	A
106_3	T	T	A	G	T	T	A	A	C	A	T	G	A	G	C	C	A	A	G	C	A	G	G	G	C	A	A	C	G	C	A	C	T	T	C	G	G	T	T	T	C	A	G	G	A	A	C	T	A
106_5	T	T	A	G	T	T	A	A	C	A	T	G	A	G	C	C	A	A	G	C	A	G	G	G	C	A	A	C	G	C	A	C	T	T	C	G	G	T	T	T	C	A	G	G	A	A	C	T	A
106_9	C	A	G	C	C	C	C	G	A	G	A	C	T	T	T	G	C	G	A	A	G	A	T	A	G	G	G	T	A	A	T	G	G	G	T	A	C	G	G	C	G	T	A	A	G	G	A	C	G
107_1	C	A	G	C	C	C	C	G	A	G	A	C	T	T	T	G	C	G	A	A	G	A	T	A	G	G	G	T	A	A	T	G	G	G	T	A	C	G	G	C	G	T	A	A	G	G	A	C	G
107_2	C	A	G	C	C	C	C	G	A	G	A	C	T	T	T	G	C	G	A	A	G	A	T	A	G	G	G	T	A	A	T	G	G	G	T	A	C	G	G	C	G	T	A	A	G	G	A	C	G
107_4	T	T	A	G	T	T	A	A	C	A	T	G	A	G	C	C	A	A	G	C	A	G	G	G	C	A	A	C	G	C	A	C	T	T	C	G	G	T	T	T	C	A	G	G	A	A	C	T	A
108_11	C	A	G	C	C	C	C	G	A	G	A	C	T	T	T	G	C	G	A	A	G	A	T	A	G	G	G	T	A	A	T	G	G	G	T	A	C	G	G	C	G	T	A	A	G	G	A	C	G
108_7	C	A	G	C	C	C	C	G	A	G	A	C	T	T	T	G	C	G	A	A	G	A	T	A	G	G	G	T	A	A	T	G	G	G	T	A	C	G	G	C	G	T	A	A	G	G	A	C	G
108_9	C	A	G	C	C	C	C	G	A	G	A	C	T	T	T	G	C	G	A	A	G	A	T	A	G	G	G	T	A	A	T	G	G	G	T	A	C	G	G	C	G	T	A	A	G	G	A	C	G
109_1	T	T	A	G	T	T	A	A	C	A	T	G	A	G	C	C	A	A	G	C	A	G	G	G	C	A	A	C	G	C	A	C	T	T	C	G	G	T	T	T	C	A	G	G	A	A	C	T	A
109_11	T	T	A	G	T	T	A	A	C	A	T	G	A	G	C	C	A	A	G	C	A	G	G	G	C	A	A	C	G	C	A	C	T	T	C	G	G	T	T	T	C	A	G	G	A	A	C	T	A
109_13	T	T	A	G	T	T	A	A	C	A	T	G	A	G	C	C	A	A	G	C	A	G	G	G	C	A	A	C	G	C	A	C	T	T	C	G	G	T	T	T	C	A	G	G	A	A	C	T	A
109_14	T	T	A	G	T	T	A	A	C	A	T	G	A	G	C	C	A	A	G	C	A	G	G	G	C	A	A	C	G	C	A	C	T	T	C	G	G	T	T	T	C	A	G	G	A	A	C	T	A
109_19	T	T	A	G	T	T	A	A	C	A	T	G	A	G	C	C	A	A	G	C	A	G	G	G	C	A	A	C	G	C	A	C	T	T	C	G	G	T	T	T	C	A	G	G	A	A	C	T	A
109_20	T	T	A	G	T	T	A	A	C	A	T	G	A	G	C	C	A	A	G	C	A	G	G	G	C	A	A	C	G	C	A	C	T	T	C	G	G	T	T	T	C	A	G	G	A	A	C	T	A
109_21	T	T	A	G	T	T	A	A	C	A	T	G	A	G	C	C	A	A	G	C	A	G	G	G	C	A	A	C	G	C	A	C	T	T	C	G	G	T	T	T	C	A	G	G	A	A	C	T	A
109_22	T	T	A	G	T	T	A	A	C	A	T	G	A	G	C	C	A	A	G	C	A	G	G	G	C	A	A	C	G	C	A	C	T	T	C	G	G	T	T	T	C	A	G	G	A	A	C	T	A
109_23	T	T	A	G	T	T	A	A	C	A	T	G	A	G	C	C	A	A	G	C	A	G	G	G	C	A	A	C	G	C	A	C	T	T	C	G	G	T	T	T	C	A	G	G	A	A	C	T	A
109_7	T	T	A	G	T	T	A	A	C	A	T	G	A	G	C	C	A	A	G	C	A	G	G	G	C	A	A	C	G	C	A	C	T	T	C	G	G	T	T	T	C	A	G	G	A	A	C	T	A
110_3	C	A	G	C	C	C	C	G	A	G	A	C	T	T	T	G	C	G	A	A	G	A	T	A	G	G	G	T	A	A	T	G	G	G	T	A	C	G	G	C	G	T	A	A	G	G	A	C	G
110_7	T	T	A	G	T	T	A	A	C	A	T	G	A	G	C	C	A	A	G	C	A	G	G	G	C	A	A	C	G	C	A	C	T	T	C	G	G	T	T	T	C	A	G	G	A	A	C	T	A
111_11	C	A	G	C	C	C	C	G	A	G	A	C	T	T	T	G	C	G	A	A	G	A	T	A	G	G	G	T	A	A	T	G	G	G	T	A	C	G	G	C	G	T	A	A	G	G	A	C	G
111_12	T	T	A	G	T	T	A	A	C	A	T	G	A	G	C	C	A	A	G	C	A	G	G	G	C	A	A	C	G	C	A	C	T	T	C	G	G	T	T	T	C	A	G	G	A	A	C	T	A
111_14	T	T	A	G	T	T	A	A	C	A	T	G	A	G	C	C	A	A	G	C	A	G	G	G	C	A	A	C	G	C	A	C	T	T	C	G	G	T	T	T	C	A	G	G	A	A	C	T	A
111_19	T	T	A	G	T	T	A	A	C	A	T	G	A	G	C	C	A	A	G	C	A	G	G	G	C	A	A	C	G	C	A	C	T	T	C	G	G	T	T	T	C	A	G	G	A	A	C	T	A
111_4	T	T	A	G	T	T	A	A	C	A	T	G	A	G	C	C	A	A	G	C	A	G	G	G	C	A	A	C	G	C	A	C	T	T	C	G	G	T	T	T	C	A	G	G	A	A	C	T	A
111_5	T	T	A	G	T	T	A	A	C	A	T	G	A	G	C	C	A	A	G	C	A	G	G	G	C	A	A	C	G	C	A	C	T	T	C	G	G	T	T	T	C	A	G	G	A	A	C	T	A
111_6	C	A	G	C	C	C	C	G	A	G	A	C	T	T	T	G	C	G	A	A	G	A	T	A	G	G	G	T	A	A	T	G	G	G	T	A	C	G	G	C	G	T	A	A	G	G	A	C	G
111_7	T	T	A	G	T	T	A	A	C	A	T	G	A	G	C	C	A	A	G	C	A	G	G	G	C	A	A	C	G	C	A	C	T	T	C	G	G	T	T	T	C	A	G	G	A	A	C	T	A
112_15	T	T	A	G	T	T	A	A	C	A	T	G	A	G	C	C	A	A	G	C	A	G	G	G	C	A	A	C	G	C	A	C	T	T	C	G	G	T	T	T	C	A	G	G	A	A	C	T	A
112_5	C	A	G	C	C	C	C	G	A	G	A	C	T	T	T	G	C	G	A	A	G	A	T	A	G	G	G	T	A	A	T	G	G	G	T	A	C	G	G	C	G	T	A	A	G	G	A	C	G
114_2	C	A	G	C	C	C	C	G	A	G	A	C	T	T	T	G	C	G	A	A	G	A	T	A	G	G	G	T	A	A	T	G	G	G	T	A	C	G	G	C	G	T	A	A	G	G	A	C	G
114_4	C	A	G	C	C	C	C	G	A	G	A	C	T	T	T	G	C	G	A	A	G	A	T	A	G	G	G	T	A	A	T	G	G	G	T	A	C	G	G	C	G	T	A	A	G	G	A	C	G
116_11	T	T	A	G	T	T	A	A	C	A	T	G	A	G	C	C	A	A	G	C	A	G	G	G	C	A	A	C	G	C	A	C	T	T	C	G	G	T	T	T	C	A	G	G	A	A	C	T	A
116_14	C	A	G	C	C	C	C	G	A	G	A	C	T	T	T	G	C	G	A	A	G	A	T	A	G	G	G	T	A	A	T	G	G	G	T	A	C	G	G	C	G	T	A	A	G	G	A	C	G
116_2	T	T	A	G	T	T	A	A	C	A	T	G	A	G	C	C	A	A	G	C	A	G	G	G	C	A	A	C	G	C	A	C	T	T	C	G	G	T	T	T	C	A	G	G	A	A	C	T	A
116_20	T	T	A	G	T	T	A	A	C	A	T	G	A	G	C	C	A	A	G	C	A	G	G	G	C	A	A	C	G	C	A	C	T	T	C	G	G	T	T	T	C	A	G	G	A	A	C	T	A
116_5	C	A	G	C	C	C	C	G	A	G	A	C	T	T	T	G	C	G	A	A	G	A	T	A	G	G	G	T	A	A	T	G	G	G	T	A	C	G	G	C	G	T	A	A	G	G	A	C	G
116_6	T	T	A	G	T	T	A	A	C	A	T	G	A	G	C	C	A	A	G	C	A	G	G	G	C	A	A	C	G	C	A	C	T	T	C	G	G	T	T	T	C	A	G	G	A	A	C	T	A
116_7	T	T	A	G	T	T	A	A	C	A	T	G	A	G	C	C	A	A	G	C	A	G	G	G	C	A	A	C	G	C	A	C	T	T	C	G	G	T	T	T	C	A	G	G	A	A	C	T	A
116_9	T	T	A	G	T	T	A	A	C	A	T	G	A	G	C	C	A	A	G	C	A	G	G	G	C	A	A	C	G	C	A	C	T	T	C	G	G	T	T	T	C	A	G	G	A	A	C	T	A
118_1	C	A	G	C	C	C	C	G	A	G	A	C	T	T	T	G	C	G	A	A	G	A	T	A	G	G	G	T	A	A	T	G	G	G	T	A	C	G	G	C	G	T	A	A	G	G	A	C	G
118_15	C	A	G	C	C	C	C	G	A	G	A	C	T	T	T	G	C	G	A	A	G	A	T	A	G	G	G	T	A	A	T	G	G	G	T	A	C	G	G	C	G	T	A	A	G	G	A	C	G
118_5	C	A	G	C	C	C	C	G	A	G	A	C	T	T	T	G	C	G	A	A	G	A	T	A	G	G	G	T	A	A	T	G	G	G	T	A	C	G	G	C	G	T	A	A	G	G	A	C	G
120_3	C	A	G	C	C	C	C	G	A	G	A	C	T	T	T	G	C	G	A	A	G	A	T	A	G	G	G	T	A	A	T	G	G	G	T	A	C	G	G	C	G	T	A	A	G	G	A	C	G
120_4	C	A	G	C	C	C	C	G	A	G	A	C	T	T	T	G	C	G	A	A	G	A	T	A	G	G	G	T	A	A	T	G	G	G	T	A	C	G	G	C	G	T	A	A	G	G	A	C	G
122_4	C	A	G	C	C	C	C	G	A	G	A	C	T	T	T	G	C	G	A	A	G	A	T	A	G	G	G	T	A	A	T	G	G	G	T	A	C	G	G	C	G	T	A	A	G	G	A	C	G
89_16	C	A	G	C	C	C	C	G	A	G	A	C	T	T	T	G	C	G	A	A	G	A	T	A	G	G	G	T	A	A	T	G	G	G	T	A	C	G	G	C	G	T	A	A	G	G	A	C	G
89_2	C	A	G	C	C	C	C	G	A	G	A	C	T	T	T	G	C	G	A	A	G	A	T	A	G	G	G	T	A	A	T	G	G	G	T	A	C	G	G	C	G	T	A	A	G	G	A	C	G
92_12	T	T	A	G	T	T	A	A	C	A	T	G	A	G	C	C	A	A	G	C	A	G	G	G	C	A	A	C	G	C	A	C	T	T	C	G	G	T	T	T	C	A	G	G	A	A	C	T	A
92_3	C	A	G	C	C	C	C	G	A	G	A	C	T	T	T	G	C	G	A	A	G	A	T	A	G	G	G	T	A	A	T	G	G	G	T	A	C	G	G	C	G	T	A	A	G	G	A	C	G
92_5	C	A	G	C	C	C	C	G	A	G	A	C	T	T	T	G	C	G	A	A	G	A	T	A	G	G	G	T	A	A	T	G	G	G	T	A	C	G	G	C	G	T	A	A	G	G	A	C	G
92_7	C	A	G	C	C	C	C	G	A	G	A	C	T	T	T	G	C	G	A	A	G	A	T	A	G	G	G	T	A	A	T	G	G	G	T	A	C	G	G	C	G	T	A	A	G	G	A	C	G
93_1	T	T	A	G	T	T	A	A	C	A	T	G	A	G	C	C	A	A	G	C	A	G	G	G	C	A	A	C	G	C	A	C	T	T	C	G	G	T	T	T	C	A	G	G	A	A	C	T	A
93_12	T	T	A	G	T	T	A	A	C	A	T	G	A	G	C	C	A	A	G	C	A	G	G	G	C	A	A	C	G	C	A	C	T	T	C	G	G	T	T	T	C	A	G	G	A	A	C	T	A
93_13	T	T	A	G	T	T	A	A	C	A	T	G	A	G	C	C	A	A	G	C	A	G	G	G	C	A	A	C	G	C	A	C	T	T	C	G	G	T	T	T	C	A	G	G	A	A	C	T	A
93_15	T	T	A	G	T	T	A	A	C	A	T	G	A	G	C	C	A	A	G	C	A	G	G	G	C	A	A	C	G	C	A	C	T	T	C	G	G	T	T	T	C	A	G	G	A	A	C	T	A
93_20	T	T	A	G	T	T	A	A	C	A	T	G	A	G	C	C	A	A	G	C	A	G	G	G	C	A	A	C	G	C	A	C	T	T	C	G	G	T	T	T	C	A	G	G	A	A	C	T	A
93_5	T	T	A	G	T	T	A	A	C	A	T	G	A	G	C	C	A	A	G	C	A	G	G	G	C	A	A	C	G	C	A	C	T	T	C	G	G	T	T	T	C	A	G	G	A	A	C	T	A
93_7	T	T	A	G	T	T	A	A	C	A	T	G	A	G	C	C	A	A	G	C	A	G	G	G	C	A	A	C	G	C	A	C	T	T	C	G	G	T	T	T	C	A	G	G	A	A	C	T	A
93_8	T	T	A	G	T	T	A	A	C	A	T	G	A	G	C	C	A	A	G	C	A	G	G	G	C	A	A	C	G	C	A	C	T	T	C	G	G	T	T	T	C	A	G	G	A	A	C	T	A
94_15	C	A	G	C	C	C	C	G	A	G	A	C	T	T	T	G	C	G	A	A	G	A	T	A	G	G	G	T	A	A	T	G	G	G	T	A	C	G	G	C	G	T	A	A	G	G	A	C	G
94_19	T	T	A	G	T	T	A	A	C	A	T	G	A	G	C	C	A	A	G	C	A	G	G	G	C	A	A	C	G	C	A	C	T	T	C	G	G	T	T	T	C	A	G	G	A	A	C	T	A
94_2	T	T	A	G	T	T	A	A	C	A	T	G	A	G	C	C	A	A	G	C	A	G	G	G	C	A	A	C	G	C	A	C	T	T	C	G	G	T	T	T	C	A	G	G	A	A	C	T	A
94_21	C	A	G	C	C	C	C	G	A	G	A	C	T	T	T	G	C	G	A	A	G	A	T	A	G	G	G	T	A	A	T	G	G	G	T	A	C	G	G	C	G	T	A	A	G	G	A	C	G
94_26	C	A	G	C	C	C	C	G	A	G	A	C	T	T	T	G	C	G	A	A	G	A	T	A	G	G	G	T	A	A	T	G	G	G	T	A	C	G	G	C	G	T	A	A	G	G	A	C	G
94_27	T	T	A	G	T	T	A	A	C	A	T	G	A	G	C	C	A	A	G	C	A	G	G	G	C	A	A	C	G	C	A	C	T	T	C	G	G	T	T	T	C	A	G	G	A	A	C	T	A
96_10	C	A	G	C	C	C	C	G	A	G	A	C	T	T	T	G	C	G	A	A	G	A	T	A	G	G	G	T	A	A	T	G	G	G	T	A	C	G	G	C	G	T	A	A	G	G	A	C	G
96_12	T	T	A	G	T	T	A	A	C	A	T	G	A	G	C	C	A	A	G	C	A	G	G	G	C	A	A	C	G	C	A	C	T	T	C	G	G	T	T	T	C	A	G	G	A	A	C	T	A
96_14	T	T	A	G	T	T	A	A	C	A	T	G	A	G	C	C	A	A	G	C	A	G	G	G	C	A	A	C	G	C	A	C	T	T	C	G	G	T	T	T	C	A	G	G	A	A	C	T	A
96_15	C	A	G	C	C	C	C	G	A	G	A	C	T	T	T	G	C	G	A	A	G	A	T	A	G	G	G	T	A	A	T	G	G	G	T	A	C	G	G	C	G	T	A	A	G	G	A	C	G
96_17	T	T	A	G	T	T	A	A	C	A	T	G	A	G	C	C	A	A	G	C	A	G	G	G	C	A	A	C	G	C	A	C	T	T	C	G	G	T	T	T	C	A	G	G	A	A	C	T	A
96_8	T	T	A	G	T	T	A	A	C	A	T	G	A	G	C	C	A	A	G	C	A	G	G	G	C	A	A	C	G	C	A	C	T	T	C	G	G	T	T	T	C	A	G	G	A	A	C	T	A
97_12	C	A	G	C	C	C	C	G	A	G	A	C	T	T	T	G	C	G	A	A	G	A	T	A	G	G	G	T	A	A	T	G	G	G	T	A	C	G	G	C	G	T	A	A	G	G	A	C	G
97_22	C	A	G	C	C	C	C	G	A	G	A	C	T	T	T	G	C	G	A	A	G	A	T	A	G	G	G	T	A	A	T	G	G	G	T	A	C	G	G	C	G	T	A	A	G	G	A	C	G
97_23	C	A	G	C	C	C	C	G	A	G	A	C	T	T	T	G	C	G	A	A	G	A	T	A	G	G	G	T	A	A	T	G	G	G	T	A	C	G	G	C	G	T	A	A	G	G	A	C	G
97_8	T	T	A	G	T	T	A	A	C	A	T	G	A	G	C	C	A	A	G	C	A	G	G	G	C	A	A	C	G	C	A	C	T	T	C	G	G	T	T	T	C	A	G	G	A	A	C	T	A
98_10	T	T	A	G	T	T	A	A	C	A	T	G	A	G	C	C	A	A	G	C	A	G	G	G	C	A	A	C	G	C	A	C	T	T	C	G	G	T	T	T	C	A	G	G	A	A	C	T	A
98_14	T	T	A	G	T	T	A	A	C	A	T	G	A	G	C	C	A	A	G	C	A	G	G	G	C	A	A	C	G	C	A	C	T	T	C	G	G	T	T	T	C	A	G	G	A	A	C	T	A
98_2	T	T	A	G	T	T	A	A	C	A	T	G	A	G	C	C	A	A	G	C	A	G	G	G	C	A	A	C	G	C	A	C	T	T	C	G	G	T	T	T	C	A	G	G	A	A	C	T	A
98_4	T	T	A	G	T	T	A	A	C	A	T	G	A	G	C	C	A	A	G	C	A	G	G	G	C	A	A	C	G	C	A	C	T	T	C	G	G	T	T	T	C	A	G	G	A	A	C	T	A
98_9	T	T	A	G	T	T	A	A	C	A	T	G	A	G	C	C	A	A	G	C	A	G	G	G	C	A	A	C	G	C	A	C	T	T	C	G	G	T	T	T	C	A	G	G	A	A	C	T	A
99_1	C	A	G	C	C	C	C	G	A	G	A	C	T	T	T	G	C	G	A	A	G	A	T	A	G	G	G	T	A	A	T	G	G	G	T	A	C	G	G	C	G	T	A	A	G	G	A	C	G
99_13	T	T	A	G	T	T	A	A	C	A	T	G	A	G	C	C	A	A	G	C	A	G	G	G	C	A	A	C	G	C	A	C	T	T	C	G	G	T	T	T	C	A	G	G	A	A	C	T	A
99_16	T	T	A	G	T	T	A	A	C	A	T	G	A	G	C	C	A	A	G	C	A	G	G	G	C	A	A	C	G	C	A	C	T	T	C	G	G	T	T	T	C	A	G	G	A	A	C	T	A
99_18	T	T	A	G	T	T	A	A	C	A	T	G	A	G	C	C	A	A	G	C	A	G	G	G	C	A	A	C	G	C	A	C	T	T	C	G	G	T	T	T	C	A	G	G	A	A	C	T	A
99_24	T	T	A	G	T	T	A	A	C	A	T	G	A	G	C	C	A	A	G	C	A	G	G	G	C	A	A	C	G	C	A	C	T	T	C	G	G	T	T	T	C	A	G	G	A	A	C	T	A
99_25	T	T	A	G	T	T	A	A	C	A	T	G	A	G	C	C	A	A	G	C	A	G	G	G	C	A	A	C	G	C	A	C	T	T	C	G	G	T	T	T	C	A	G	G	A	A	C	T	A
Larry	T	T	A	G	T	T	A	A	C	A	T	G	A	G	C	C	A	A	G	C	A	G	G	G	C	A	A	C	G	C	A	C	T	T	C	G	G	T	T	T	C	A	G	G	A	A	C	T	A
Danby	C	A	G	C	C	C	C	G	A	G	A	C	T	T	T	G	C	G	A	A	G	A	T	A	G	G	A	T	G	A	T	G	G	G	T	A	C	G	G	C	G	T	A	A	A	G	A	C	G
106_2	T	T	A	G	T	T	A	A	C	A	T	G	A	G	C	C	A	A	G	C	A	G	G	G	C	A	A	C	G	C	A	C	T	T	C	G	G	T	T	T	C	A	G	G	A	A	C	T	A
106_6	Y	W	R	S	Y	Y	M	R	M	R	W	S	W	K	Y	S	M	R	R	M	R	R	K	R	S	R	R	Y	R	M	W	S	K	K	Y	R	S	K	K	Y	S	W	R	R	R	R	M	Y	R
108_2	C	A	G	C	C	C	C	G	A	G	A	C	T	T	T	G	C	G	A	A	G	A	T	A	G	G	G	T	A	A	T	G	G	G	T	A	C	G	G	C	G	T	A	A	G	G	A	C	G
109_12	T	T	A	G	T	T	A	A	C	A	T	G	A	G	C	C	A	A	G	C	A	G	G	G	C	A	A	C	G	C	A	C	T	T	C	G	G	T	T	T	C	A	G	G	A	A	C	T	A
109_15	T	T	A	G	T	T	A	A	C	A	T	G	A	G	C	C	A	A	G	C	A	G	G	G	C	A	A	C	G	C	A	C	T	T	C	G	G	T	T	T	C	A	G	G	A	A	C	T	A
109_17	T	T	A	G	T	T	A	A	C	A	T	G	A	G	C	C	A	A	G	C	A	G	G	G	C	A	A	C	G	C	A	C	T	T	C	G	G	T	T	T	C	A	G	G	A	A	C	T	A
109_3	C	A	G	C	C	C	C	G	A	G	A	C	T	T	T	G	C	G	A	A	G	A	T	A	G	G	G	T	A	A	T	G	G	G	T	A	C	G	G	C	G	T	A	A	G	G	A	C	G
109_5	T	T	A	G	T	T	A	A	C	A	T	G	A	G	C	C	A	A	G	C	A	G	G	G	C	A	A	C	G	C	A	C	T	T	C	G	G	T	T	T	C	A	G	G	A	A	C	T	A
109_8	T	T	A	G	T	T	A	A	C	A	T	G	A	G	C	C	A	A	G	C	A	G	G	G	C	A	A	C	G	C	A	C	T	T	C	G	G	T	T	T	C	A	G	G	A	A	C	T	A
111_17	C	A	G	C	C	C	C	G	A	G	A	C	T	T	T	G	C	G	A	A	G	A	T	A	G	G	G	T	A	A	T	G	G	G	T	A	C	G	G	C	G	T	A	A	G	G	A	C	G
111_8	T	T	A	G	T	T	A	A	C	A	T	G	A	G	C	C	A	A	G	C	A	G	G	G	C	A	A	C	G	C	A	C	T	T	C	G	G	T	T	T	C	A	G	G	A	A	C	T	A
112_11	C	A	G	C	C	C	C	G	A	G	A	C	T	T	T	G	C	G	A	A	G	A	T	A	G	G	G	T	A	A	T	G	G	G	T	A	C	G	G	C	G	T	A	A	G	G	A	C	G
112_16	T	T	A	G	T	T	A	A	C	A	T	G	A	G	C	C	A	A	G	C	A	G	G	G	C	A	A	C	G	C	A	C	T	T	C	G	G	T	T	T	C	A	G	G	A	A	C	T	A
112_4	T	T	A	G	T	T	A	A	C	A	T	G	A	G	C	C	A	A	G	C	A	G	G	G	C	A	A	C	G	C	A	C	T	T	C	G	G	T	T	T	C	A	G	G	A	A	C	T	A
112_6	C	A	G	C	C	C	C	G	A	G	A	C	T	T	T	G	C	G	A	A	G	A	T	A	G	G	G	T	A	A	T	G	G	G	T	A	C	G	G	C	G	T	A	A	G	G	A	C	G
112_7	C	A	G	C	C	C	C	G	A	G	A	C	T	T	T	G	C	G	A	A	G	A	T	A	G	G	G	T	A	A	T	G	G	G	T	A	C	G	G	C	G	T	A	A	G	G	A	C	G
114_8	T	T	A	G	T	T	A	A	C	A	T	G	A	G	C	C	A	A	G	C	A	G	G	G	C	A	A	C	G	C	A	C	T	T	C	G	G	T	T	T	C	A	G	G	A	A	C	T	A
116_10	T	T	A	G	T	T	A	A	C	A	T	G	A	G	C	C	A	A	G	C	A	G	G	G	C	A	A	C	G	C	A	C	T	T	C	G	G	T	T	T	C	A	G	G	A	A	C	T	A
116_12	T	T	A	G	T	T	A	A	C	A	T	G	A	G	C	C	A	A	G	C	A	G	G	G	C	A	A	C	G	C	A	C	T	T	C	G	G	T	T	T	C	A	G	G	A	A	C	T	A
116_13	T	T	A	G	T	T	A	A	C	A	T	G	A	G	C	C	A	A	G	C	A	G	G	G	C	A	A	C	G	C	A	C	T	T	C	G	G	T	T	T	C	A	G	G	A	A	C	T	A
116_16	T	T	A	G	T	T	A	A	C	A	T	G	A	G	C	C	A	A	G	C	A	G	G	G	C	A	A	C	G	C	A	C	T	T	C	G	G	T	T	T	C	A	G	G	A	A	C	T	A
116_17	T	T	A	G	T	T	A	A	C	A	T	G	A	G	C	C	A	A	G	C	A	G	G	G	C	A	A	C	G	C	A	C	T	T	C	G	G	T	T	T	C	A	G	G	A	A	C	T	A
116_18	T	T	A	G	T	T	A	A	C	A	T	G	A	G	C	C	A	A	G	C	A	G	G	G	C	A	A	C	G	C	A	C	T	T	C	G	G	T	T	T	C	A	G	G	A	A	C	T	A
116_19	T	T	A	G	T	T	A	A	C	A	T	G	A	G	C	C	A	A	G	C	A	G	G	G	C	A	A	C	G	C	A	C	T	T	C	G	G	T	T	T	C	A	G	G	A	A	C	T	A
116_21	T	T	A	G	T	T	A	A	C	A	T	G	A	G	C	C	A	A	G	C	A	G	G	G	C	A	A	C	G	C	A	C	T	T	C	G	G	T	T	T	C	A	G	G	A	A	C	T	A
116_3	T	T	A	G	T	T	A	A	C	A	T	G	A	G	C	C	A	A	G	C	A	G	G	G	C	A	A	C	G	C	A	C	T	T	C	G	G	T	T	T	C	A	G	G	A	A	C	T	A
116_4	T	T	A	G	T	T	A	A	C	A	T	G	A	G	C	C	A	A	G	C	A	G	G	G	C	A	A	C	G	C	A	C	T	T	C	G	G	T	T	T	C	A	G	G	A	A	C	T	A
117_1	C	A	G	C	C	C	C	G	A	G	A	C	T	T	T	G	C	G	A	A	G	A	T	A	G	G	G	T	A	A	T	G	G	G	T	A	C	G	G	C	G	T	A	A	G	G	A	C	G
118_13	C	A	G	C	C	C	C	G	A	G	A	C	T	T	T	G	C	G	A	A	G	A	T	A	G	G	G	T	A	A	T	G	G	G	T	A	C	G	G	C	G	T	A	A	G	G	A	C	G
118_16	C	A	G	C	C	C	C	G	A	G	A	C	T	T	T	G	C	G	A	A	G	A	T	A	G	G	G	T	A	A	T	G	G	G	T	A	C	G	G	C	G	T	A	A	G	G	A	C	G
118_18	C	A	G	C	C	C	C	G	A	G	A	C	T	T	T	G	C	G	A	A	G	A	T	A	G	G	G	T	A	A	T	G	G	G	T	A	C	G	G	C	G	T	A	A	G	G	A	C	G
118_2	C	A	G	C	C	C	C	G	A	G	A	C	T	T	T	G	C	G	A	A	G	A	T	A	G	G	G	T	A	A	T	G	G	G	T	A	C	G	G	C	G	T	A	A	G	G	A	C	G
118_20	C	A	G	C	C	C	C	G	A	G	A	C	T	T	T	G	C	G	A	A	G	A	T	A	G	G	G	T	A	A	T	G	G	G	T	A	C	G	G	C	G	T	A	A	G	G	A	C	G
118_3	C	A	G	C	C	C	C	G	A	G	A	C	T	T	T	G	C	G	A	A	G	A	T	A	G	G	G	T	A	A	T	G	G	G	T	A	C	G	G	C	G	T	A	A	G	G	A	C	G
118_4	C	A	G	C	C	C	C	G	A	G	A	C	T	T	T	G	C	G	A	A	G	A	T	A	G	G	G	T	A	A	T	G	G	G	T	A	C	G	G	C	G	T	A	A	G	G	A	C	G
118_6	C	A	G	C	C	C	C	G	A	G	A	C	T	T	T	G	C	G	A	A	G	A	T	A	G	G	G	T	A	A	T	G	G	G	T	A	C	G	G	C	G	T	A	A	G	G	A	C	G
118_8	C	A	G	C	C	C	C	G	A	G	A	C	T	T	T	G	C	G	A	A	G	A	T	A	G	G	G	T	A	A	T	G	G	G	T	A	C	G	G	C	G	T	A	A	G	G	A	C	G
120_1	C	A	G	C	C	C	C	G	A	G	A	C	T	T	T	G	C	G	A	A	G	A	T	A	G	G	G	T	A	A	T	G	G	G	T	A	C	G	G	C	G	T	A	A	G	G	A	C	G
120_2	C	A	G	C	C	C	C	G	A	G	A	C	T	T	T	G	C	G	A	A	G	A	T	A	G	G	G	T	A	A	T	G	G	G	T	A	C	G	G	C	G	T	A	A	G	G	A	C	G
121_2	C	A	G	C	C	C	C	G	A	G	A	C	T	T	T	G	C	G	A	A	G	A	T	A	G	G	G	T	A	A	T	G	G	G	T	A	C	G	G	C	G	T	A	A	G	G	A	C	G
121_4	C	A	G	C	C	C	C	G	A	G	A	C	T	T	T	G	C	G	A	A	G	A	T	A	G	G	G	T	A	A	T	G	G	G	T	A	C	G	G	C	G	T	A	A	G	G	A	C	G
121_8	C	A	G	C	C	C	C	G	A	G	A	C	T	T	T	G	C	G	A	A	G	A	T	A	G	G	G	T	A	A	T	G	G	G	T	A	C	G	G	C	G	T	A	A	G	G	A	C	G
122_1	C	A	G	C	C	C	C	G	A	G	A	C	T	T	T	G	C	G	A	A	G	A	T	A	G	G	G	T	A	A	T	G	G	G	T	A	C	G	G	C	G	T	A	A	G	G	A	C	G
122_5	C	A	G	C	C	C	C	G	A	G	A	C	T	T	T	G	C	G	A	A	G	A	T	A	G	G	G	T	A	A	T	G	G	G	T	A	C	G	G	C	G	T	A	A	G	G	A	C	G
122_6	C	A	G	C	C	C	C	G	A	G	A	C	T	T	T	G	C	G	A	A	G	A	T	A	G	G	G	T	A	A	T	G	G	G	T	A	C	G	G	C	G	T	A	A	G	G	A	C	G
122_8	C	A	G	C	C	C	C	G	A	G	A	C	T	T	T	G	C	G	A	A	G	A	T	A	G	G	G	T	A	A	T	G	G	G	T	A	C	G	G	C	G	T	A	A	G	G	A	C	G
123_1	T	T	A	G	T	T	A	A	C	A	T	G	A	G	C	C	A	A	G	C	A	G	G	G	C	A	A	C	G	C	A	C	T	T	C	G	G	T	T	T	C	A	G	G	A	A	C	T	A
123_3	T	T	A	G	T	T	A	A	C	A	T	G	A	G	C	C	A	A	G	C	A	G	G	G	C	A	A	C	G	C	A	C	T	T	C	G	G	T	T	T	C	A	G	G	A	A	C	T	A
89_11	C	A	G	C	C	C	C	G	A	G	A	C	T	T	T	G	C	G	A	A	G	A	T	A	G	G	G	T	A	A	T	G	G	G	T	A	C	G	G	C	G	T	A	A	G	G	A	C	G
89_12	C	A	G	C	C	C	C	G	A	G	A	C	T	T	T	G	C	G	A	A	G	A	T	A	G	G	G	T	A	A	T	G	G	G	T	A	C	G	G	C	G	T	A	A	G	G	A	C	G
89_7	C	A	G	C	C	C	C	G	A	G	A	C	T	T	T	G	C	G	A	A	G	A	T	A	G	G	G	T	A	A	T	G	G	G	T	A	C	G	G	C	G	T	A	A	G	G	A	C	G
92_1	C	A	G	C	C	C	C	G	A	G	A	C	T	T	T	G	C	G	A	A	G	A	T	A	G	G	G	T	A	A	T	G	G	G	T	A	C	G	G	C	G	T	A	A	G	G	A	C	G
92_11	C	A	G	C	C	C	C	G	A	G	A	C	T	T	T	G	C	G	A	A	G	A	T	A	G	G	G	T	A	A	T	G	G	G	T	A	C	G	G	C	G	T	A	A	G	G	A	C	G
92_6	C	A	G	C	C	C	C	G	A	G	A	C	T	T	T	G	C	G	A	A	G	A	T	A	G	G	G	T	A	A	T	G	G	G	T	A	C	G	G	C	G	T	A	A	G	G	A	C	G
92_8	T	T	A	G	T	T	A	A	C	A	T	G	A	G	C	C	A	A	G	C	A	G	G	G	C	A	A	C	G	C	A	C	T	T	C	G	G	T	T	T	C	A	G	G	A	A	C	T	A
93_10	T	T	A	G	T	T	A	A	C	A	T	G	A	G	C	C	A	A	G	C	A	G	G	G	C	A	A	C	G	C	A	C	T	T	C	G	G	T	T	T	C	A	G	G	A	A	C	T	A
93_16	T	T	A	G	T	T	A	A	C	A	T	G	A	G	C	C	A	A	G	C	A	G	G	G	C	A	A	C	G	C	A	C	T	T	C	G	G	T	T	T	C	A	G	G	A	A	C	T	A
93_18	T	T	A	G	T	T	A	A	C	A	T	G	A	G	C	C	A	A	G	C	A	G	G	G	C	A	A	C	G	C	A	C	T	T	C	G	G	T	T	T	C	A	G	G	A	A	C	T	A
93_19	T	T	A	G	T	T	A	A	C	A	T	G	A	G	C	C	A	A	G	C	A	G	G	G	C	A	A	C	G	C	A	C	T	T	C	G	G	T	T	T	C	A	G	G	A	A	C	T	A
93_21	T	T	A	G	T	T	A	A	C	A	T	G	A	G	C	C	A	A	G	C	A	G	G	G	C	A	A	C	G	C	A	C	T	T	C	G	G	T	T	T	C	A	G	G	A	A	C	T	A
93_22	T	T	A	G	T	T	A	A	C	A	T	G	A	G	C	C	A	A	G	C	A	G	G	G	C	A	A	C	G	C	A	C	T	T	C	G	G	T	T	T	C	A	G	G	A	A	C	T	A
93_3	T	T	A	G	T	T	A	A	C	A	T	G	A	G	C	C	A	A	G	C	A	G	G	G	C	A	A	C	G	C	A	C	T	T	C	G	G	T	T	T	C	A	G	G	A	A	C	T	A
93_6	T	T	A	G	T	T	A	A	C	A	T	G	A	G	C	C	A	A	G	C	A	G	G	G	C	A	A	C	G	C	A	C	T	T	C	G	G	T	T	T	C	A	G	G	A	A	C	T	A
93_9	T	T	A	G	T	T	A	A	C	A	T	G	A	G	C	C	A	A	G	C	A	G	G	G	C	A	A	C	G	C	A	C	T	T	C	G	G	T	T	T	C	A	G	G	A	A	C	T	A
94_11	T	T	A	G	T	T	A	A	C	A	T	G	A	G	C	C	A	A	G	C	A	G	G	G	C	A	A	C	G	C	A	C	T	T	C	G	G	T	T	T	C	A	G	G	A	A	C	T	A
94_20	C	A	G	C	C	C	C	G	A	G	A	C	T	T	T	G	C	G	A	A	G	A	T	A	G	G	G	T	A	A	T	G	G	G	T	A	C	G	G	C	G	T	A	A	G	G	A	C	G
94_23	C	A	G	C	C	C	C	G	A	G	A	C	T	T	T	G	C	G	A	A	G	A	T	A	G	G	G	T	A	A	T	G	G	G	T	A	C	G	G	C	G	T	A	A	G	G	A	C	G
96_11	Y	W	R	S	Y	Y	M	R	M	R	W	S	W	K	Y	S	M	R	R	M	R	R	K	R	S	R	R	Y	R	M	W	S	K	K	Y	R	S	K	K	Y	S	W	R	R	R	R	M	Y	R
96_9	T	T	A	G	T	T	A	A	C	A	T	G	A	G	C	C	A	A	G	C	A	G	G	G	C	A	A	C	G	C	A	C	T	T	C	G	G	T	T	T	C	A	G	G	A	A	C	T	A
97_1	C	A	G	C	C	C	C	G	A	G	A	C	T	T	T	G	C	G	A	A	G	A	T	A	G	G	G	T	A	A	T	G	G	G	T	A	C	G	G	C	G	T	A	A	G	G	A	C	G
97_10	C	A	G	C	C	C	C	G	A	G	A	C	T	T	T	G	C	G	A	A	G	A	T	A	G	G	G	T	A	A	T	G	G	G	T	A	C	G	G	C	G	T	A	A	G	G	A	C	G
97_18	C	A	G	C	C	C	C	G	A	G	A	C	T	T	T	G	C	G	A	A	G	A	T	A	G	G	G	T	A	A	T	G	G	G	T	A	C	G	G	C	G	T	A	A	G	G	A	C	G
97_19	C	A	G	C	C	C	C	G	A	G	A	C	T	T	T	G	C	G	A	A	G	A	T	A	G	G	G	T	A	A	T	G	G	G	T	A	C	G	G	C	G	T	A	A	G	G	A	C	G
97_20	C	A	G	C	C	C	C	G	A	G	A	C	T	T	T	G	C	G	A	A	G	A	T	A	G	G	G	T	A	A	T	G	G	G	T	A	C	G	G	C	G	T	A	A	G	G	A	C	G
97_21	C	A	G	C	C	C	C	G	A	G	A	C	T	T	T	G	C	G	A	A	G	A	T	A	G	G	G	T	A	A	T	G	G	G	T	A	C	G	G	C	G	T	A	A	G	G	A	C	G
97_6	C	A	G	C	C	C	C	G	A	G	A	C	T	T	T	G	C	G	A	A	G	A	T	A	G	G	G	T	A	A	T	G	G	G	T	A	C	G	G	C	G	T	A	A	G	G	A	C	G
98_11	T	T	A	G	T	T	A	A	C	A	T	G	A	G	C	C	A	A	G	C	A	G	G	G	C	A	A	C	G	C	A	C	T	T	C	G	G	T	T	T	C	A	G	G	A	A	C	T	A
98_15	T	T	A	G	T	T	A	A	C	A	T	G	A	G	C	C	A	A	G	C	A	G	G	G	C	A	A	C	G	C	A	C	T	T	C	G	G	T	T	T	C	A	G	G	A	A	C	T	A
98_17	C	A	G	C	C	C	C	G	A	G	A	C	T	T	T	G	C	G	A	A	G	A	T	A	G	G	G	T	A	A	T	G	G	G	T	A	C	G	G	C	G	T	A	A	G	G	A	C	G
98_18	T	T	A	G	T	T	A	A	C	A	T	G	A	G	C	C	A	A	G	C	A	G	G	G	C	A	A	C	G	C	A	C	T	T	C	G	G	T	T	T	C	A	G	G	A	A	C	T	A
98_19	C	A	G	C	C	C	C	G	A	G	A	C	T	T	T	G	C	G	A	A	G	A	T	A	G	G	G	T	A	A	T	G	G	G	T	A	C	G	G	C	G	T	A	A	G	G	A	C	G
98_3	C	A	G	C	C	C	C	G	A	G	A	C	T	T	T	G	C	G	A	A	G	A	T	A	G	G	G	T	A	A	T	G	G	G	T	A	C	G	G	C	G	T	A	A	G	G	A	C	G
99_11	T	T	A	G	T	T	A	A	C	A	T	G	A	G	C	C	A	A	G	C	A	G	G	G	C	A	A	C	G	C	A	C	T	T	C	G	G	T	T	T	C	A	G	G	A	A	C	T	A
99_12	T	T	A	G	T	T	A	A	C	A	T	G	A	G	C	C	A	A	G	C	A	G	G	G	C	A	A	C	G	C	A	C	T	T	C	G	G	T	T	T	C	A	G	G	A	A	C	T	A
99_14	T	T	A	G	T	T	A	A	C	A	T	G	A	G	C	C	A	A	G	C	A	G	G	G	C	A	A	C	G	C	A	C	T	T	C	G	G	T	T	T	C	A	G	G	A	A	C	T	A
99_15	T	T	A	G	T	T	A	A	C	A	T	G	A	G	C	C	A	A	G	C	A	G	G	G	C	A	A	C	G	C	A	C	T	T	C	G	G	T	T	T	C	A	G	G	A	A	C	T	A
99_17	T	T	A	G	T	T	A	A	C	A	T	G	A	G	C	C	A	A	G	C	A	G	G	G	C	A	A	C	G	C	A	C	T	T	C	G	G	T	T	T	C	A	G	G	A	A	C	T	A
99_20	T	T	A	G	T	T	A	A	C	A	T	G	A	G	C	C	A	A	G	C	A	G	G	G	C	A	A	C	G	C	A	C	T	T	C	G	G	T	T	T	C	A	G	G	A	A	C	T	A
99_22	T	T	A	G	T	T	A	A	C	A	T	G	A	G	C	C	A	A	G	C	A	G	G	G	C	A	A	C	G	C	A	C	T	T	C	G	G	T	T	T	C	A	G	G	A	A	C	T	A
99_23	T	T	A	G	T	T	A	A	C	A	T	G	A	G	C	C	A	A	G	C	A	G	G	G	C	A	A	C	G	C	A	C	T	T	C	G	G	T	T	T	C	A	G	G	A	A	C	T	A
99_7	T	T	A	G	T	T	A	A	C	A	T	G	A	G	C	C	A	A	G	C	A	G	G	G	C	A	A	C	G	C	A	C	T	T	C	G	G	T	T	T	C	A	G	G	A	A	C	T	A
99_8	T	T	A	G	T	T	A	A	C	A	T	G	A	G	C	C	A	A	G	C	A	G	G	G	C	A	A	C	G	C	A	C	T	T	C	G	G	T	T	T	C	A	G	G	A	A	C	T	A
99_9	T	T	A	G	T	T	A	A	C	A	T	G	A	G	C	C	A	A	G	C	A	G	G	G	C	A	A	C	G	C	A	C	T	T	C	G	G	T	T	T	C	A	G	G	A	A	C	T	A
KanMark	T	T	A	G	T	T	A	A	C	A	T	G	A	G	C	C	A	A	G	C	A	G	G	G	C	A	A	C	G	C	A	C	T	T	C	G	G	T	T	T	C	A	G	G	A	A	C	T	A
KS061862M_17	T	T	A	G	T	T	A	A	M	A	W	S	A	G	C	S	A	A	G	C	A	G	G	G	C	A	A	C	G	C	A	C	T	T	C	G	G	T	T	T	C	A	G	G	A	A	C	T	A
106_7	Y	W	R	S	Y	Y	M	R	M	R	W	S	W	K	Y	S	M	R	R	M	R	R	K	R	S	R	R	Y	R	M	W	S	K	K	Y	R	S	K	K	Y	S	W	R	R	R	R	M	Y	R
108_3	C	A	G	C	C	C	C	G	A	G	A	C	T	T	T	G	C	G	A	A	G	A	T	A	G	G	G	T	A	A	T	G	G	G	T	A	C	G	G	C	G	T	A	A	G	G	A	C	G
108_6	C	A	G	C	C	C	C	G	A	G	A	C	T	T	T	G	C	G	A	A	G	A	T	A	G	G	G	T	A	A	T	G	G	G	T	A	C	G	G	C	G	T	A	A	G	G	A	C	G
111_13	C	A	G	C	C	C	C	G	A	G	A	C	T	T	T	G	C	G	A	A	G	A	T	A	G	G	G	T	A	A	T	G	G	G	T	A	C	G	G	C	G	T	A	A	G	G	A	C	G
111_18	T	T	A	G	T	T	A	A	C	A	T	G	A	G	C	C	A	A	G	C	A	G	G	G	C	A	A	C	G	C	A	C	T	T	C	G	G	T	T	T	C	A	G	G	A	A	C	T	A
111_9	T	T	A	G	T	T	A	A	C	A	T	G	A	G	C	C	A	A	G	C	A	G	G	G	C	A	A	C	G	C	A	C	T	T	C	G	G	T	T	T	C	A	G	G	A	A	C	T	A
112_1	C	A	G	C	C	C	C	G	A	G	A	C	T	T	T	G	C	G	A	A	G	A	T	A	G	G	G	T	A	A	T	G	G	G	T	A	C	G	G	C	G	T	A	A	G	G	A	C	G
112_10	C	A	G	C	C	C	C	G	A	G	A	C	T	T	T	G	C	G	A	A	G	A	T	A	G	G	G	T	A	A	T	G	G	G	T	A	C	G	G	C	G	T	A	A	G	G	A	C	G
112_13	T	T	A	G	T	T	A	A	C	A	T	G	A	G	C	C	A	A	G	C	A	G	G	G	C	A	A	C	G	C	A	C	T	T	C	G	G	T	T	T	C	A	G	G	A	A	C	T	A
112_14	C	A	G	C	C	C	C	G	A	G	A	C	T	T	T	G	C	G	A	A	G	A	T	A	G	G	G	T	A	A	T	G	G	G	T	A	C	G	G	C	G	T	A	A	G	G	A	C	G
112_2	T	T	A	G	T	T	A	A	C	A	T	G	A	G	C	C	A	A	G	C	A	G	G	G	C	A	A	C	G	C	A	C	T	T	C	G	G	T	T	T	C	A	G	G	A	A	C	T	A
114_10	C	A	G	C	C	C	C	G	A	G	A	C	T	T	T	G	C	G	A	A	G	A	T	A	G	G	G	T	A	A	T	G	G	G	T	A	C	G	G	C	G	T	A	A	G	G	A	C	G
116_1	T	T	A	G	T	T	A	A	C	A	T	G	A	G	C	C	A	A	G	C	A	G	G	G	C	A	A	C	G	C	A	C	T	T	C	G	G	T	T	T	C	A	G	G	A	A	C	T	A
116_15	C	A	G	C	C	C	C	G	A	G	A	C	T	T	T	G	C	G	A	A	G	A	T	A	G	G	G	T	A	A	T	G	G	G	T	A	C	G	G	C	G	T	A	A	G	G	A	C	G
116_8	T	T	A	G	T	T	A	A	C	A	T	G	A	G	C	C	A	A	G	C	A	G	G	G	C	A	A	C	G	C	A	C	T	T	C	G	G	T	T	T	C	A	G	G	A	A	C	T	A
117_3	C	A	G	C	C	C	C	G	A	G	A	C	T	T	T	G	C	G	A	A	G	A	T	A	G	G	G	T	A	A	T	G	G	G	T	A	C	G	G	C	G	T	A	A	G	G	A	C	G
118_10	C	A	G	C	C	C	C	G	A	G	A	C	T	T	T	G	C	G	A	A	G	A	T	A	G	G	G	T	A	A	T	G	G	G	T	A	C	G	G	C	G	T	A	A	G	G	A	C	G
118_11	C	A	G	C	C	C	C	G	A	G	A	C	T	T	T	G	C	G	A	A	G	A	T	A	G	G	G	T	A	A	T	G	G	G	T	A	C	G	G	C	G	T	A	A	G	G	A	C	G
118_12	C	A	G	C	C	C	C	G	A	G	A	C	T	T	T	G	C	G	A	A	G	A	T	A	G	G	G	T	A	A	T	G	G	G	T	A	C	G	G	C	G	T	A	A	G	G	A	C	G
118_14	C	A	G	C	C	C	C	G	A	G	A	C	T	T	T	G	C	G	A	A	G	A	T	A	G	G	G	T	A	A	T	G	G	G	T	A	C	G	G	C	G	T	A	A	G	G	A	C	G
118_17	C	A	G	C	C	C	C	G	A	G	A	C	T	T	T	G	C	G	A	A	G	A	T	A	G	G	G	T	A	A	T	G	G	G	T	A	C	G	G	C	G	T	A	A	G	G	A	C	G
118_7	C	A	G	C	C	C	C	G	A	G	A	C	T	T	T	G	C	G	A	A	G	A	T	A	G	G	G	T	A	A	T	G	G	G	T	A	C	G	G	C	G	T	A	A	G	G	A	C	G
118_9	C	A	G	C	C	C	C	G	A	G	A	C	T	T	T	G	C	G	A	A	G	A	T	A	G	G	G	T	A	A	T	G	G	G	T	A	C	G	G	C	G	T	A	A	G	G	A	C	G
121_1	C	A	G	C	C	C	C	G	A	G	A	C	T	T	T	G	C	G	A	A	G	A	T	A	G	G	G	T	A	A	T	G	G	G	T	A	C	G	G	C	G	T	A	A	G	G	A	C	G
121_7	C	A	G	C	C	C	C	G	A	G	A	C	T	T	T	G	C	G	A	A	G	A	T	A	G	G	G	T	A	A	T	G	G	G	T	A	C	G	G	C	G	T	A	A	G	G	A	C	G
122_7	C	A	G	C	C	C	C	G	A	G	A	C	T	T	T	G	C	G	A	A	G	A	T	A	G	G	G	T	A	A	T	G	G	G	T	A	C	G	G	C	G	T	A	A	G	G	A	C	G
89_10	C	A	G	C	C	C	C	G	A	G	A	C	T	T	T	G	C	G	A	A	G	A	T	A	G	G	G	T	A	A	T	G	G	G	T	A	C	G	G	C	G	T	A	A	G	G	A	C	G
89_13	C	A	G	C	C	C	C	G	A	G	A	C	T	T	T	G	C	G	A	A	G	A	T	A	G	G	G	T	A	A	T	G	G	G	T	A	C	G	G	C	G	T	A	A	G	G	A	C	G
89_14	C	A	G	C	C	C	C	G	A	G	A	C	T	T	T	G	C	G	A	A	G	A	T	A	G	G	G	T	A	A	T	G	G	G	T	A	C	G	G	C	G	T	A	A	G	G	A	C	G
89_15	C	A	G	C	C	C	C	G	A	G	A	C	T	T	T	G	C	G	A	A	G	A	T	A	G	G	G	T	A	A	T	G	G	G	T	A	C	G	G	C	G	T	A	A	G	G	A	C	G
89_17	C	A	G	C	C	C	C	G	A	G	A	C	T	T	T	G	C	G	A	A	G	A	T	A	G	G	G	T	A	A	T	G	G	G	T	A	C	G	G	C	G	T	A	A	G	G	A	C	G
89_3	C	A	G	C	C	C	C	G	A	G	A	C	T	T	T	G	C	G	A	A	G	A	T	A	G	G	G	T	A	A	T	G	G	G	T	A	C	G	G	C	G	T	A	A	G	G	A	C	G
89_4	C	A	G	C	C	C	C	G	A	G	A	C	T	T	T	G	C	G	A	A	G	A	T	A	G	G	G	T	A	A	T	G	G	G	T	A	C	G	G	C	G	T	A	A	G	G	A	C	G
89_5	C	A	G	C	C	C	C	G	A	G	A	C	T	T	T	G	C	G	A	A	G	A	T	A	G	G	G	T	A	A	T	G	G	G	T	A	C	G	G	C	G	T	A	A	G	G	A	C	G
89_6	C	A	G	C	C	C	C	G	A	G	A	C	T	T	T	G	C	G	A	A	G	A	T	A	G	G	G	T	A	A	T	G	G	G	T	A	C	G	G	C	G	T	A	A	G	G	A	C	G
89_8	C	A	G	C	C	C	C	G	A	G	A	C	T	T	T	G	C	G	A	A	G	A	T	A	G	G	G	T	A	A	T	G	G	G	T	A	C	G	G	C	G	T	A	A	G	G	A	C	G
93_2	T	T	A	G	T	T	A	A	C	A	T	G	A	G	C	C	A	A	G	C	A	G	G	G	C	A	A	C	G	C	A	C	T	T	C	G	G	T	T	T	C	A	G	G	A	A	C	T	A
93_4	T	T	A	G	T	T	A	A	C	A	T	G	A	G	C	C	A	A	G	C	A	G	G	G	C	A	A	C	G	C	A	C	T	T	C	G	G	T	T	T	C	A	G	G	A	A	C	T	A
94_1	T	T	A	G	T	T	A	A	C	A	T	G	A	G	C	C	A	A	G	C	A	G	G	G	C	A	A	C	G	C	A	C	T	T	C	G	G	T	T	T	C	A	G	G	A	A	C	T	A
94_16	T	T	A	G	T	T	A	A	C	A	T	G	A	G	C	C	A	A	G	C	A	G	G	G	C	A	A	C	G	C	A	C	T	T	C	G	G	T	T	T	C	A	G	G	A	A	C	T	A
94_18	C	A	G	C	C	C	C	G	A	G	A	C	T	T	T	G	C	G	A	A	G	A	T	A	G	G	G	T	A	A	T	G	G	G	T	A	C	G	G	C	G	T	A	A	G	G	A	C	G
94_28	C	A	G	C	C	C	C	G	A	G	A	C	T	T	T	G	C	G	A	A	G	A	T	A	G	G	G	T	A	A	T	G	G	G	T	A	C	G	G	C	G	T	A	A	G	G	A	C	G
94_3	T	T	A	G	T	T	A	A	C	A	T	G	A	G	C	C	A	A	G	C	A	G	G	G	C	A	A	C	G	C	A	C	T	T	C	G	G	T	T	T	C	A	G	G	A	A	C	T	A
94_4	C	A	G	C	C	C	C	G	A	G	A	C	T	T	T	G	C	G	A	A	G	A	T	A	G	G	G	T	A	A	T	G	G	G	T	A	C	G	G	C	G	T	A	A	G	G	A	C	G
94_6	C	A	G	C	C	C	C	G	A	G	A	C	T	T	T	G	C	G	A	A	G	A	T	A	G	G	G	T	A	A	T	G	G	G	T	A	C	G	G	C	G	T	A	A	G	G	A	C	G
97_11	C	A	G	C	C	C	C	G	A	G	A	C	T	T	T	G	C	G	A	A	G	A	T	A	G	G	G	T	A	A	T	G	G	G	T	A	C	G	G	C	G	T	A	A	G	G	A	C	G
97_13	C	A	G	C	C	C	C	G	A	G	A	C	T	T	T	G	C	G	A	A	G	A	T	A	G	G	G	T	A	A	T	G	G	G	T	A	C	G	G	C	G	T	A	A	G	G	A	C	G
97_14	C	A	G	C	C	C	C	G	A	G	A	C	T	T	T	G	C	G	A	A	G	A	T	A	G	G	G	T	A	A	T	G	G	G	T	A	C	G	G	C	G	T	A	A	G	G	A	C	G
97_15	C	A	G	C	C	C	C	G	A	G	A	C	T	T	T	G	C	G	A	A	G	A	T	A	G	G	G	T	A	A	T	G	G	G	T	A	C	G	G	C	G	T	A	A	G	G	A	C	G
97_16	C	A	G	C	C	C	C	G	A	G	A	C	T	T	T	G	C	G	A	A	G	A	T	A	G	G	G	T	A	A	T	G	G	G	T	A	C	G	G	C	G	T	A	A	G	G	A	C	G
97_2	C	A	G	C	C	C	C	G	A	G	A	C	T	T	T	G	C	G	A	A	G	A	T	A	G	G	G	T	A	A	T	G	G	G	T	A	C	G	G	C	G	T	A	A	G	G	A	C	G
97_4	C	A	G	C	C	C	C	G	A	G	A	C	T	T	T	G	C	G	A	A	G	A	T	A	G	G	G	T	A	A	T	G	G	G	T	A	C	G	G	C	G	T	A	A	G	G	A	C	G
97_7	C	A	G	C	C	C	C	G	A	G	A	C	T	T	T	G	C	G	A	A	G	A	T	A	G	G	G	T	A	A	T	G	G	G	T	A	C	G	G	C	G	T	A	A	G	G	A	C	G
97_9	C	A	G	C	C	C	C	G	A	G	A	C	T	T	T	G	C	G	A	A	G	A	T	A	G	G	G	T	A	A	T	G	G	G	T	A	C	G	G	C	G	T	A	A	G	G	A	C	G
98_7	T	T	A	G	T	T	A	A	C	A	T	G	A	G	C	C	A	A	G	C	A	G	G	G	C	A	A	C	G	C	A	C	T	T	C	G	G	T	T	T	C	A	G	G	A	A	C	T	A
99_2	T	T	A	G	T	T	A	A	C	A	T	G	A	G	C	C	A	A	G	C	A	G	G	G	C	A	A	C	G	C	A	C	T	T	C	G	G	T	T	T	C	A	G	G	A	A	C	T	A
99_21	T	T	A	G	T	T	A	A	C	A	T	G	A	G	C	C	A	A	G	C	A	G	G	G	C	A	A	C	G	C	A	C	T	T	C	G	G	T	T	T	C	A	G	G	A	A	C	T	A
99_6	T	T	A	G	T	T	A	A	C	A	T	G	A	G	C	C	A	A	G	C	A	G	G	G	C	A	A	C	G	C	A	C	T	T	C	G	G	T	T	T	C	A	G	G	A	A	C	T	A
KS061278M_4	C	A	G	C	C	C	C	G	A	G	A	C	T	T	T	G	C	G	A	A	G	A	T	A	G	G	A	T	G	A	T	G	G	G	T	A	C	G	G	C	G	T	A	A	A	G	A	C	G
112_9	C	A	G	C	C	C	C	G	A	G	A	C	T	T	T	G	C	G	A	A	G	A	T	A	G	G	G	T	A	A	T	G	G	G	T	A	C	G	G	C	G	T	A	A	G	G	A	C	G
89_9	C	A	G	C	C	C	C	G	A	G	A	C	T	T	T	G	C	G	A	A	G	A	T	A	G	G	G	T	A	A	T	G	G	G	T	A	C	G	G	C	G	T	A	A	G	G	A	C	G
97_3	C	A	G	C	C	C	C	G	A	G	A	C	T	T	T	G	C	G	A	A	G	A	T	A	G	G	G	T	A	A	T	G	G	G	T	A	C	G	G	C	G	T	A	A	G	G	A	C	G
94_5	C	A	G	C	C	C	C	G	A	G	A	C	T	T	T	G	C	G	A	A	G	A	T	A	G	G	G	T	A	A	T	G	G	G	T	A	C	G	G	C	G	T	A	A	G	G	A	C	G
94_7	C	A	G	C	C	C	C	G	A	G	A	C	T	T	T	G	C	G	A	A	G	A	T	A	G	G	G	T	A	A	T	G	G	G	T	A	C	G	G	C	G	T	A	A	G	G	A	C	G
112_12	C	A	G	C	C	C	C	G	A	G	A	C	T	T	T	G	C	G	A	A	G	A	T	A	G	G	G	T	A	A	T	G	G	G	T	A	C	G	G	C	G	T	A	A	G	G	A	C	G
112_8	C	A	G	C	C	C	C	G	A	G	A	C	T	T	T	G	C	G	A	A	G	A	T	A	G	G	G	T	A	A	T	G	G	G	T	A	C	G	G	C	G	T	A	A	G	G	A	C	G
107_3	T	T	A	G	T	T	A	A	C	A	T	G	A	G	C	C	A	A	G	C	A	G	G	G	C	A	A	C	G	C	A	C	T	T	C	G	G	T	T	T	C	A	G	G	A	A	C	T	A
109_16	Y	W	R	S	Y	Y	M	R	M	R	W	S	W	K	Y	S	M	R	R	M	R	R	K	R	S	R	R	Y	R	M	W	S	K	K	Y	R	S	K	K	Y	S	W	R	R	R	R	M	Y	R
111_2	Y	W	R	S	Y	Y	M	R	M	R	W	S	W	K	Y	S	M	R	R	M	R	R	K	R	S	R	R	Y	R	M	W	S	K	K	Y	R	S	K	K	Y	S	W	R	R	R	R	M	Y	R
114_1	C	A	G	C	C	C	C	G	A	G	A	C	T	T	T	G	C	G	A	A	G	A	T	A	G	G	G	T	A	A	T	G	G	G	T	A	C	G	G	C	G	T	A	A	G	G	A	C	G
114_3	C	A	G	C	C	C	C	G	A	G	A	C	T	T	T	G	C	G	A	A	G	A	T	A	G	G	G	T	A	A	T	G	G	G	T	A	C	G	G	C	G	T	A	A	G	G	A	C	G
114_5	C	A	G	C	C	C	C	G	A	G	A	C	T	T	T	G	C	G	A	A	G	A	T	A	G	G	G	T	A	A	T	G	G	G	T	A	C	G	G	C	G	T	A	A	G	G	A	C	G
114_7	C	A	G	C	C	C	C	G	A	G	A	C	T	T	T	G	C	G	A	A	G	A	T	A	G	G	G	T	A	A	T	G	G	G	T	A	C	G	G	C	G	T	A	A	G	G	A	C	G
114_9	C	A	G	C	C	C	C	G	A	G	A	C	T	T	T	G	C	G	A	A	G	A	T	A	G	G	G	T	A	A	T	G	G	G	T	A	C	G	G	C	G	T	A	A	G	G	A	C	G
117_2	C	A	G	C	C	C	C	G	A	G	A	C	T	T	T	G	C	G	A	A	G	A	T	A	G	G	G	T	A	A	T	G	G	G	T	A	C	G	G	C	G	T	A	A	G	G	A	C	G
118_19	C	A	G	C	C	C	C	G	A	G	A	C	T	T	T	G	C	G	A	A	G	A	T	A	G	G	G	T	A	A	T	G	G	G	T	A	C	G	G	C	G	T	A	A	G	G	A	C	G
89_1	C	A	G	C	C	C	C	G	A	G	A	C	T	T	T	G	C	G	A	A	G	A	T	A	G	G	G	T	A	A	T	G	G	G	T	A	C	G	G	C	G	T	A	A	G	G	A	C	G
94_10	C	A	G	C	C	C	C	G	A	G	A	C	T	T	T	G	C	G	A	A	G	A	T	A	G	G	G	T	A	A	T	G	G	G	T	A	C	G	G	C	G	T	A	A	G	G	A	C	G
97_17	C	A	G	C	C	C	C	G	A	G	A	C	T	T	T	G	C	G	A	A	G	A	T	A	G	G	G	T	A	A	T	G	G	G	T	A	C	G	G	C	G	T	A	A	G	G	A	C	G
98_6	T	T	A	G	T	T	A	A	C	A	T	G	A	G	C	C	A	A	G	C	A	G	G	G	C	A	A	C	G	C	A	C	T	T	C	G	G	T	T	T	C	A	G	G	A	A	C	T	A
98_8	C	A	G	C	C	C	C	G	A	G	A	C	T	T	T	G	C	G	A	A	G	A	T	A	G	G	G	T	A	A	T	G	G	G	T	A	C	G	G	C	G	T	A	A	G	G	A	C	G
99_3	T	T	A	G	T	T	A	A	C	A	T	G	A	G	C	C	A	A	G	C	A	G	G	G	C	A	A	C	G	C	A	C	T	T	C	G	G	T	T	T	C	A	G	G	A	A	C	T	A
99_5	C	A	G	C	C	C	C	G	A	G	A	C	T	T	T	G	C	G	A	A	G	A	T	A	G	G	G	T	A	A	T	G	G	G	T	A	C	G	G	C	G	T	A	A	G	G	A	C	G
TA10077	C	A	G	C	C	C	C	G	A	G	A	C	T	T	T	G	C	G	A	A	G	A	T	A	G	G	G	T	A	A	T	G	G	G	T	A	C	G	G	C	G	T	A	A	G	G	A	C	G
TA10106	C	A	G	C	C	C	C	G	A	G	A	C	T	T	T	G	C	G	A	A	G	A	T	A	G	G	G	T	A	A	T	G	G	G	T	A	C	G	G	C	G	T	A	A	G	G	A	C	G
TA10142	C	A	G	C	C	C	C	G	A	G	T	C	T	T	T	G	C	G	A	A	G	A	T	G	C	G	G	T	A	A	T	G	G	G	T	A	C	G	G	C	G	T	A	A	G	G	A	C	G
TA10155	C	A	G	C	C	C	C	G	A	G	A	C	T	T	T	G	C	G	A	A	G	A	T	A	G	G	G	T	A	A	T	G	G	G	T	A	C	G	G	C	G	T	A	A	G	G	A	C	G
TA10166	C	A	G	C	C	C	C	G	A	G	A	C	T	T	T	G	C	G	A	A	G	A	T	A	G	G	G	T	A	A	T	G	G	G	T	A	C	G	G	C	G	T	A	A	G	G	A	C	G
TA10189	C	A	G	C	C	C	C	G	A	G	A	C	T	T	T	G	C	G	A	A	G	A	T	A	G	G	G	T	A	A	T	G	G	G	T	A	C	G	G	C	G	T	A	A	G	G	A	C	G
TA10193	C	A	G	C	C	C	C	G	A	G	A	C	T	T	T	G	C	G	A	A	G	A	T	A	G	G	G	T	A	A	T	G	G	G	T	A	C	G	G	C	G	T	A	A	G	G	A	C	G
TA1634	C	A	G	C	C	C	C	G	A	G	A	C	T	T	T	G	C	G	A	A	G	A	T	A	G	G	G	T	A	A	T	G	G	G	T	A	C	G	G	C	G	T	A	A	G	G	A	C	G
TA1642	T	T	A	G	T	T	A	A	C	A	T	G	A	G	C	C	A	A	G	C	A	G	G	G	C	A	A	C	G	C	A	C	T	T	C	G	G	T	T	T	C	A	G	G	A	A	C	T	A
TA2374	C	A	G	C	C	C	C	G	A	G	A	C	T	T	T	G	C	G	A	A	G	A	T	A	G	G	G	T	A	A	T	G	G	G	T	A	C	G	G	C	G	T	A	A	G	G	A	C	G
TA2378	C	A	G	C	C	C	C	G	A	G	T	C	T	T	T	G	C	G	A	A	G	A	T	G	C	G	G	T	A	A	T	G	G	G	T	A	C	G	G	C	G	T	A	A	G	G	A	C	G
TA2388	C	A	G	C	C	C	C	G	A	G	A	C	T	T	T	G	C	G	A	A	G	A	T	A	G	G	G	T	A	A	T	G	G	G	T	A	C	G	G	C	G	T	A	A	G	G	A	C	G
TA2389	C	A	G	C	C	C	C	G	A	G	A	C	T	T	T	G	C	G	A	A	G	A	T	A	G	G	G	T	A	A	T	G	G	G	T	A	C	G	G	C	G	T	A	A	G	G	A	C	G
TA2395	C	A	G	C	C	C	C	G	A	G	A	C	T	T	T	G	C	G	A	A	G	A	T	A	G	G	G	T	A	A	T	G	G	G	T	A	C	G	G	C	G	T	A	A	G	G	A	C	G
TA2398	C	A	G	C	C	C	C	G	A	G	A	C	T	T	T	G	C	G	A	A	G	A	T	A	G	G	G	T	A	A	T	G	G	G	T	A	C	G	G	C	G	T	A	A	G	G	A	C	G
TA2489	C	A	G	C	C	C	C	G	A	G	A	C	T	T	T	G	C	G	A	A	G	A	T	A	G	G	G	T	A	A	T	G	G	G	T	A	C	G	G	C	G	T	A	A	G	G	A	C	G
TA2521	C	A	G	C	C	C	C	G	A	G	A	C	T	T	T	G	C	G	A	A	G	A	T	A	G	G	G	T	A	A	T	G	G	G	T	A	C	G	G	C	G	T	A	A	G	G	A	C	G
TA2536	C	A	G	C	C	C	C	G	A	G	A	C	T	T	T	G	C	G	A	A	G	A	T	A	G	G	G	T	A	A	T	G	G	G	T	A	C	G	G	C	G	T	A	A	G	G	A	C	G
TA2538	C	A	G	C	C	C	C	G	A	G	A	C	T	T	T	G	C	G	A	A	G	A	T	A	G	G	G	T	A	A	T	G	G	G	T	A	C	G	G	C	G	T	A	A	G	G	A	C	G
TA2543	C	A	G	C	C	C	C	G	A	G	A	C	T	T	T	G	C	G	A	A	G	A	T	A	G	G	G	T	A	A	T	G	G	G	T	A	C	G	G	C	G	T	A	A	G	G	A	C	G
TA2567	C	A	G	C	C	C	C	G	A	G	A	C	T	T	T	G	C	G	A	A	G	A	T	A	G	G	G	T	A	A	T	G	G	G	T	A	C	G	G	C	G	T	A	A	G	G	A	C	G
[truncated: 70 more columns]
